# Supplementary material for: Quantifying Earth system interactions for sustainable food production: an expert elicitation
Source: Research Square preprint supplement (doi:10.21203/rs.3.rs-1085622/v1), 2021-12-03
Supplement: Supplementary file 1 [file 598d4ffe9928757e9ff32e13.xlsx]

## Sheet: READ ME
The data available in the following spreadsheets are as described below
elicitation_results_all
All results of the second (final) elicitation round, standardized to 100% confidence interval. These values can be used to draw a PERT distribution and used like described in Methods and Supplementary material. Data on tipping points, mediating mechanisms ranking, and cascading effects are also provided.
mechanisms_&_literature
Descriptions of the mechanisms mediating the identified interactions in this expert elicitation. Includes also relevant (but not exhaustive) literature suggested by (but not limited to) the elicitation participants.
ranking_mechanisms
Mechanisms identified in the first elicitation round, used for eliciting the mediating mechanism ranking in the second elicitation round (column ranking in elicitation_results_all).

## Sheet: elicitation_results_all
Interaction	Expert	Season	Lower	Upper	Best	CI	Region	Reasoning	Tipping point	Explanation for tipping point	Ranking	Cascading	Nitrogen critical limit
Biland_Bifresh	Exp14	no	0.65	0.85	0.75	100	No, general changes	Decline in animal populations will result in an erosion of ecosystem function and loss of ecosystem services. Fewer vertebrates would lead to less nutrients entering freshwater ecosystems, so decline in fish stocks. Also, if riparian zone looses integrity, then important habitat, spawning grounds etc for fish will be loss, which could lead to a decline in population	0	I don't know of any evidence for direct tipping point, so have set this at 0	D) > A > C > B	Unlikely, given the definitive nature of the river / lake
Biland_Bifresh	Exp16	no	0.8	0.826667	0.8	100	Bears hunting salmon from a river	I think a reduction in terrestrial biodiversity will have little impact on freshwater biodiversity. Maybe some keystone fish species will increase if they are not hunted by birds or animals.	0		b,d,a,c
Biland_Bifresh	Exp23	no	0.294737	0.715789	0.4	100	No	Changes in Land BII often changes water and N/P run-off into nearby freshwater ecosystems, potentially leading to droughts, turbidity (through soil erosion) and over-fertilization (leading to anoxid processes) can highly affect freshwater ecosystems and drastically change it. But there might be strong variability in influences	80	Land to water ecosystems highly coupled	a) d)-> structural changes c) -> general ecological changes b) -> specific ecological change	no
Biland_Bifresh	Exp29	no	0.641667	0.908333	0.875	100	none	Terrestrial species influence the number and abundance of freshwater fish species, for example a brown bear fishing salmon or a hereon in rivers. Reducing the BII would therefore at best likely increase fish biomass. However, equally there could be indirect feedback loops with many drivers of BII decline equally affecting freshwater species	0	I think any non-linear relationship or tipping point would likely be caused by changes in indirect drivers that reduce both freshwater fish biomass and BII.
Biland_Bifresh	Exp37	no	0.747143	0.79	0.79	100	No	I think the worst situation fish biomass will reduce with BII linearly. Otherwise, the terrestrial biodiversity intactness has relatively less impact on freshwater fish	94		cdab	No
Biland_Bifresh	Exp41	no	0	1.03333	0.7	100	Australia, Americas	Depending on the nature of the change and how it changes river flow, riparian zone structure, in river habitat it could have a big effect	85	This is when you start to see some of the large habitat changes in terms of significant change in large ground cover and associated food webs which should have knock on effects on what ends up in the river. Could happen earlier, but this is when there would be a very clear signal	d,a,b,c. Again hard to give a linear scoring as predation and nutrient flow both effect ecosystem functioning (for example) What is important will likely also differ system to system, something that is close to eutrophication already will more easily tip into that making a or d look more important, whereas something far from eutrophication that has a high predator population (think some of the cl…	Yes, again by effecting highly mobile predators or fish stocks. Basically you get cross scale effects every time you either have some form of connectivity across the scales (e.g. via dispersal or physical flow) or the process is a life history or ecosystem structure/function bottleneck.
Biland_Bifresh	Exp48	no	0.2	1	0.6	100	None	The process is non-linear so depending on various boundary conditions and species in our interest.	80	Depending on the variables considers, the process can be non-linear at any given points or time.
Biland_Bifresh	Exp45	no	0.756471	0.803529	0.78	100	-	little interaction assumed first, but the reasonings by other experts (below) made me to decrease values slightly now	0	no tipping assumed, thus set to 0	Above ranking is the right order I think, with nutrient flow changes affecting instream water quality and biodiversity probably being a prime reason of interaction. The other processes are in my view of minor relevance. I would just change the order of b) and c), i.e. ecosystem functioning prior to predation.	Yes it could, depending on over how large a scale the affected freshwater ecosystem is to other ecosystems, e.g. streams can run through lakes and produce effects there too, and of course also in possibly distant downstream areas incl. coastal zones.
Biland_Biocean	Exp12	no	0.3	0.833333	0.7	100	No	Impact of terrestrial ecosystem function on local coastal ecosystems through transfer of energy and material	50
Biland_Biocean	Exp16	no	0.8	0.8	0.8	100	no specific region	The main link is indirect, a functioning ecosystem will have less nutrient loss and therefore less nutrient impact on coastal ecosystem	0
Biland_Biocean	Exp23	no	0.6	1	0.8	100	No	Very little influence of Bii on land to BII on ocean only through changes in river discharge and geochemical flows of upstream rivers	10	Very weak coupling	c) a) + b) -> almost similar issues: both are 'materials' that are needed for river ecosystem functioning d) -> not sure about the connection/mechanism behind this	no
Biland_Biocean	Exp29	no	0.466667	0.8	0.8	100	Mangroves	Some coastal flooded plant communities and intact ecosystems (mangroves) are linked to spawning and raising grounds of many tropical and subtropical fish species. Reducing the intactness of these ecosystems is probably linked to decreases in fish biomass.	60	Relating to fish species in tropical and subtropical regions. The overall loss of forest cover (instead of BII) is likely to be much bigger though.
Biland_Biocean	Exp37	no	0.751429	0.794286	0.78	100	no	I think the worst situation will reduce with BII linearly.	88	I think the best situation is in line with BII	cbda	No
Biland_Biocean	Exp41	no	0	0.942857	0.8	100	No, though influenced by places I've worked extensively (Americas, Australia, SE Asia)	Widespread land use change can occur without significantly impacting the productivity of coastal marine habitats if riparian buffers remain in place and waterflow, nutrient flow doesn't push the nursery habitat beyond thresholds (thus Europe, US etc still haev fish stocks). However, where a threshold is passed there can be a significant drop - as shown by salmon	80	You need to start having systemic change, down into invertebrates and microfauna, not simply landuse cover change. Australia is a good example as we've been able to see the losses that happened on other continents before record keeping began	If I had to answer linearly then it would be a, d, b, c. But the reality is they are all interconnected - river flow transmits the geochemical and energy flow and these things (along with river flow) then shape the spawning and nursey grounds as well as forage fields	Yes if it hits the nursery grounds of a species that can distribute widely or of it hits a source population that makes a disproportionate contribution to the rest of the system. There is another way too (which we couldn't talk about under round one direct effects) and that is via human use and behaviour - degraded lands undermining agriculture can see humans switch to fisheries instead (this has…
Biland_Biocean	Exp45	no	0.778947	0.8	0.8	100	-	Just in very specific circumstances I would assume an effect from terrestrial BII change to coastal areas, when the regions are quite directly connected	0	no tipping point	I would put c first (as discharge is the connector between land and coastal region), all others equal	I think this is already a cascading effect resulting from the interaction of BII land --> BII freshwater (see explanation there)
Biland_LSC	Exp10	no	78	86.3333	83	100	None, possibly tropical for the importance of seed dispersal	Decrease in BII is likely to have a greater than proportion impact on forest cover, as forests would lose plant intactness as well as the species that contribute to maintaining the forest e.g. seed dispersers	40	At this large reduction in BII, large losses in forest cover would be expected	e a d c b f e is the most important because it covers all ecosystem functioning. Seed dispersal is very important for forest ecosystems, especially in the tropics	(a) particularly could have cascading effects at macro scales because many bird seed dispersers migrate long distances. Any reduction in forest cover can have global climate implications.
Biland_LSC	Exp14	no	88.3333	97.6667	95	100	None	A major decline in biotic integrity could lead to changes in land systems, notably a decline of ecosystem function. I agree that direction of change is complex though, and decline in diversity may lead to a change in forest type, not necessarily a decline in forest cover	0	I'm not sure if there would be a tipping point in this interaction	e > c=d > a >f > b	I don't think so.
Biland_LSC	Exp16	no	90	90	90	100	no specific region	I think the impact is the other way around, loss of forest will impact biodiversity	0
Biland_LSC	Exp17	no	66.3333	91.3333	88	100	Probably mid- to low-latitudes, where I expect BIl to provide a fair amount of buffer capacity.	I think that at these high values of BIl, the effects on forest cover should be quite low, if at all. I think BIl has a good buffering effect when it's high.	60	again, I think this is a non-informative median in a big range that is dependent on the biome, context, forest type etc. I fear some of these analyses can easily be trumped by studies on plantations with technically high forest cover but low BIl.	I think the role of biodiversity on biogeochemical flows and soil formation is missing. otherwise, I see all of the mechanisms as having ± same ranking, with perhaps the megaherbivores being more strongly context (and initial condition) dependent.	seed dispersal, pollination, pest control and ecosystem functioning would, definitely at least at the regional scale
Biland_LSC	Exp23	no	40	120	80	100	no	Decrease of BII may drastically change species necessary for forest to be maintained. Species decrease may remove important decomposter, plant pest control species, and pollinators	80	many species provide key functions that are essenatial for forest maintainance (e.g. pollinators, pest control)	e) d) c) -> special case of e) a) f) + b) -> somehow both identical as megaherbivors may be main consumers of seedlings	yes, as terr Biodiv influences forest cover and forest stability in various aspects given obove, decline in biodiversity changes risk of forest loss that influences large scale/global moisture recycling, precipitation patterns, mitigation of extreme weahterh event and soil degradtion
Biland_LSC	Exp21	no	75.7143	90	90	100	None	The BII seems pretty high, so not sure there would be a dramatic impact on forest cover with such a decline. However, impacts that reduce species richness could impact pollinator population and seed dispersion	70		C A E F D B
Biland_LSC	Exp24	no	86	90	90	100	No	Most studies I know have examined this relationship in the other direction (forests affecting BII). So this is just a guess. Biodiversity does provide various ecosystem services that should affect forest cover. But I do not imagine that such a small decrease in biodiversity would have any large impact on forest cover. Maybe if biodiversity collapses below a certain threshold, there would be loss …	0
Biland_LSC	Exp29	no	67.3529	90.8824	85	100	Temperate and tropical forests with tree species dependend on animal seed dispersal	A loss of biotic intactness in forests, for instance of seed-dispersing birds or mammals or pollinating insects, can cause further cascades that reduce the recruitment of tree species. However this most likely won't reduce overall forest cover considerably, but reduce the diversity of tree species and heterogeneity of forest structure. Albrecht, J., Berens, D.G., Jaroszewicz, B., Selva, N., Brand…	0	Unlikely that this will ever become non-linear. Even if all native species (including native tree species) have been lost, a (empty) forest can still grow
Biland_LSC	Exp37	no	83	92	88	100	No	I think the worst situation forest area will reduce with BII linearly. The best situation the forest area will not change due to reduction of BII	0	There is no specific evidence that BII will change forest cover.	ecabdf	Yes. Forest change will affect biodiversity, and other ecosystem services at a regional and global scale.
Biland_LSC	Exp45	no	86.25	92.5	90	100	no	This can go either way due to (regionally) strong linkage between BII and forest (so I would not even exclude an increase in BII)	65		I would put p e) higher on the list, to the first. Also the forest types (cover) that would change are also part of the terrestrial biodiversity, so that they affect each other immediately	effects at larger scale are posible through effects in the climate system, such as downwind precipitation effects (due to the process chain: forest cover changed through/with biodiversity)
Biland_Biog	Exp14	no	0.4	0.5	0.5	100	No.	Such a small decline in BII is unlikely to have an impact on N run-off, although degradation of some terrestrial ecosystems could result in increased N release (eg upland soils)	0	I'm not sure that any decline in vertebrate population would result in a tipping point for N.	a) is plausible, although I don't see why greater terrestrial biodiversity would lead to greater manure on land, unless we just assume biodiversity = e.g. megafauna	I don't think so.
Biland_Biog	Exp16	no	0.48	0.58	0.52	100	no specific region	Functioning ecosystem will have less nutrient losses	0
Biland_Biog	Exp21	no	0.478571	0.907143	0.55	100	None	Declining BI on Land would likely lead to less ability to absorb runoff before they get to rivers.	0	I don't have a good estimate for this	C B A
Biland_Biog	Exp23	no	0.5	0.8	0.6	100	No	BII reduction can control N uptake into vegetation/soil or higher in food chain, and reduce leaching	60	Drastical change in BII needed to allow for N leaching (as this is often the reducing component for growth in all vegetation species)	c) a) -> same as c) but for freshwater ecoystem b)	yes creation of anoxid zones (see explantions given earlier elswhere)
Biland_Biog	Exp25	no	0.7	0.842857	0.7	100	Temperate (e.g France), Mediterranean (e.g. Spain)	This clearly depends on the ecosystem traits that are affected. For example, riparian forests provide an important ecosystem services for N retention of surfaced runoff before the water arrives to freshwater that can reduce N flows and concentration by 10% to 50% (Billen et al. 2018 Biogeochemistry). If these systems are not affected, no interaction would be expected.	0	Difficult to estimate since N retention ecosystems could be not fully affected when BII is affected	a, c, b Depending on where we are riparian forest can play a more important role. For example in semiarid systems where riparian forests are still active in the dry season. In temperate areas ecosystem uptake can be important even during the summer
Biland_Biog	Exp34	no	0.2	1.2	0.8	100	no	Reducing biological integrity would likely result in more N runoff.	50	Guestimate. The real answer would depend a lot on where in the watershed the biological integrity was compromised.
Biland_Biog	Exp37	no	0.525	0.575	0.525	100	No	The biodiversity loss will weak the regulation function of the ecosystem.	92	The best situation is in line with BII	bac	No
Biland_Blue	Exp11	High	51.875	76.875	67.5	100	US Upper Midwest (rainfed agriculture)	A decrease in BII would likely correspond to some replacement of natural vegetation with human ecosystems (agriculture, urban). In both of these cases, the specific type of new vegetation would determine the high flow response. Envisioning rainfed agriculture replacing native forest or prairie, evidence indicates that rivers tend to get flashier, with a higher peak in response to rainfall events,…	100	I think this interaction would be nonlinear throughout the entire range of BII. I imagine a sigmoid shape curve, with relatively little change in discharge at high levels of BII, rapid change at intermediate levels of BII, and then low levels of change at low levels of BII.	a,b,c,d,e - I think they are listed in the descending order already!	Yes, because all of these processes describe effects on a river system, they could have impacts on discharge not just in the region of interest but anywhere downstream.
Biland_Blue	Exp11	Low	83.125	98.75	92.5	100		Unlike high flows, I think that low flows are more likely to decrease with BII decrease, though again the nature of the relationship would be strongly dependent on the driver of BII change (urbanization, agriculture, etc). However, most (but not all) of these mechanisms would lead to a decrease in low flows. From a more ""meta"" perspective, I am finding that my answers/thought process for the BI…	100	Same response as for high flows - I think this interaction would be nonlinear throughout the entire range of BII. I imagine a sigmoid shape curve, with relatively little change in discharge at high levels of BII, rapid change at intermediate levels of BII, and then low levels of change at low levels of BII.
Biland_Blue	Exp14	High	55	75	65	100	Temperate zone	If BI Land declined so much, land degradation would lead to more soil erosion, and less interception of water, so greater flow. But with levels of 95-90%, I doubt much change to blur water would occur esp during high flow	50	For tipping point in flow decline to occur during the wet season, major decline in BI Land would be needed	c>d>a>b>e	I don't think so
Biland_Blue	Exp14	Low	85	95	95	100		As low flow discharge is rather similar to pre-industrial flow, I would expect changes of a 5% decline in BII to have minimal impact	50	As before, a major decline in BI Land would be needed for a tipping point in flow season dicharge to occur.
Biland_Blue	Exp16	High	65	65	65	100	no specific region	no obvious link here	0
Biland_Blue	Exp16	Low	95	95	95	100		no obvious link here	0
Biland_Blue	Exp21	High	52.8571	67.1429	60	100	None specifically	Diminished ecosystems would likely lead to increased soil erosion. This could lead to greater sedimentation in irrigation systems reducing the flow of water through irrigation systems	0	I don't have a good estimate for this	B D C A E
Biland_Blue	Exp21	Low	82.8571	97.1429	90	100		Suspect factors with sediment are less of a problem in low flow	0	I don't have a good estimate for this
Biland_Blue	Exp23	High	35	85	55	100	no	Most likely to have influence on feshwater system	90	Strong overall changes with reduction expected	a) (with b) as special case) unclear what 'land degradation' means. Usually term is used for human induced land changes but I guess here land degrations through weathering and soil degradation is meant c) d) -> second effect of c) is sedimentation transport. Hower when said 'irrigation systems' a human perspective is taken	no
Biland_Blue	Exp23	Low	55	105	90	100		Strong reduction may very drastically change freshwater ecoystem	80	Transgreassion minimal flow requirement and risk of droughts will completely alter freshwater ecosystem
Biland_Blue	Exp37	High	56.8571	64	64	100	No	I think the worst situation high flow season discharge in nearby freshwater ecosystems will change with BII linearly. Otherwise, high flow season discharge in nearby freshwater ecosystems will change slightly	92		abdce	No
Biland_Blue	Exp37	Low	86	94	94	100		I think the worst situation low flow season discharge in nearby freshwater ecosystems will change with BII linearly. Otherwise, low flow season discharge in nearby freshwater ecosystems will change slightly	90
Biland_Blue	Exp45	High	59.25	65.5	63	100	any region and actually any scale	As runoff responds sensitive to vegetation changes / BII changes	50	assuming that this involves strong change in vegetation relevant for runoff generation	Agree with this order (though I do not see why a) and b) are separated)	More complex chains: terrestrial BII -> forest cover -> regional and global climate change -> forest cover and BII ...
Biland_Blue	Exp45	Low	91.75	95.5	93	100		As runoff responds sensitive to vegetation changes / BII changes	40	assuming that this involves strong change in vegetation relevant fpr runoff generation
Biland_Blue	Exp49	High	55	75	65	100	none	To the extent that the decrease in BII is due to altered habitat, there could be water balance impacts. The decrease in BII could be due to, for example, afforestation or deforestation, and the change in land use, for example, to irrigated agriculture or urbanization, is not is not taken into account. Therefore, it is not possible to estimate a positive or negative feedback, or to what extent, in…	0
Biland_Blue	Exp49	Low	85	105	95	100		To the extent that the decrease in BII is due to altered habitat, there could be water balance impacts. The decrease in BII could be due to, for example, afforestation or deforestation, and the change in land use, for example, to irrigated agriculture or urbanization, is not is not taken into account. Therefore, it is not possible to estimate a positive or negative feedback, or to what extent, in…	0
Biland_Green	Exp11	no	91.625	95.375	93.5	100	I was thinking generally of a forest being replaced by agriculture; both the Amazon and the US Upper Midwest came to my mind.	A decrease in BII would likely correspond to some replacement of natural vegetation with human ecosystems (agriculture, urban). In this case, there may be some degradation of the soil water holding capacity, but likely not in a 1:1 manner with BII since agricultural land still has a significant soil moisture pool.	70	I would guess this relationship became nonlinear once the amount of land use change was sufficient to disrupt regional circulation patterns, which I estimated at 70% based on Zemp et al. (2017) for the Amazon.	b,c,a,e,d	Mechanism (e) seems most likely to have effects beyond the hypothetical area via changes in precipitation in downwind areas. The mechanisms including erosion (b,c) could also have other types of impacts elsewhere, for example on aquatic ecosystems.
Biland_Green	Exp13	no	93.8889	95	95	100	-	The suggested BII change would not be enough to provide a physical feedback mechanism. Evaporation and infiltration are not likely affected	20	This is a very speculative, but certain soils (e.g. clayey soils) would need a minimum of biological activity to enhance infiltration	a, c, b, d, e	e, but I am not convinced about the validity of the mechanism
Biland_Green	Exp14	no	88.3333	97.6667	95	100	Temperate	A decline in BII may lead to a decline in soil moisture, depending on what aspects of BII have changed e.g. replacement by agricultural land or urban environment would likely see a decline in soil moisture, eg through potential for increased erosion.	50	A major decline in populations would be needed to cause a non-linear change	b>a=d>c	e) would be true in a tropical forest where it generates its own precip, eg Amazon
Biland_Green	Exp16	no	95	95	95	100	no specific region	Can't see any significant link here	0
Biland_Green	Exp21	no	73.3333	98.3333	90	100	None	Poorer ecosystems would be prone to less ground cover facilitating evapotranspiration. Also more potential for erosion	0	I don't have a good estimate for this	D B C A E
Biland_Green	Exp23	no	95	95	95	100	no	No effect expected	0	No thershold expected	d) with a) as extential factor e) b) + c) are mostly identical	yes, changes in BI changes vegetation that influcence evapotranspiration that changes precipitation patterns elsewhere
Biland_Green	Exp37	no	88.7143	94.4286	93	100	No	The worst situation growing season soil moisture on nearby land will change with BII linearly. In addtion the reduction of BII will weaken the regulation function of ecosystem	92		abdce	No
Biland_Green	Exp48	no	77.5	96.25	90	100	None.	Growing season soil moisture depends a lot on rainfall and soil properties. Minor decrease (on average) could decrease soil moisture in similar magnitude (on average).	95	Always non-linear process (i.e., rain water infiltration and runoff generation)
Biland_Green	Exp45	no	90.8235	94.3529	92	100	-	Change in plant composition inevitably changes soil moisture (and vice versa), so the change might be in the same range	70	some nonlinear effects of any kind could happen at many stages of BII and soil moisture, so I set this value relatively close to the current value	I would move d) up to the first place as the soil moisture effect would primarily come from vegetation change. b) and c) are largely redundant	The example in e) shows such a potentially large scale effect
Biland_Green	Exp49	no	85	105	95	100	none	To the extent that the decrease in BII is due to altered habitat, there could be water balance impacts. The reason for the decrease in BII is not taken into account. Therefore, it is not possible to estimate a positive or negative feedback, or to what extent, in soil moisture- though I would expect an impact. A decrease in BII from 95% to 90% is still a very high level of intactness, so the value…	0
Bifresh_Biland	Exp14	no	85	95	95	100	Possibly north America, but unlikely in northern Europe were landscapes are already heavily transformed	A decline in fish species could lead to a decline in protein sources for some terrestrial vertebrates, so resulting in a decline in BI Land. But proportion of dependant vertebrates would not be so great But as others have pointed out, this could be greater in North America which has more wildlands. In Europe, the Living Planet Index suggests that migratory freshwater fish populations have decline…	0.1	Reent Living Planet Index shows a 93% collapse in migratory freshwater fish populations in Europe, but I'm not able to find any accompanying evidence for a decline in BI Land, hence why I think the effect can only very weak at best	D (most important) > C > B > A	Hypothetically if a migratory animal was impacted or one that had a wide habitat range?
Bifresh_Biland	Exp16	no	80	96	88	100	Bears that feed on salmon	A loss of freshwater species could impact birds and animals that depend on them as a food source	0
Bifresh_Biland	Exp21	no	46.6667	105	80	100	No specific region in mind	Fish serve as important sources of food for species on land. Biodiversity of freshwater important for processing nutrients and maintaining water quality. Also important in terms of maintaining stable insect populations.	0.4		D) C) A) B)
Bifresh_Biland	Exp23	no	65	101	95	100	No	Loss of keystone fish biomass will have probably very little effect on BII on land. Fish biomass loss may tip system into turbid conditions creating anoxic conditions and disrupt re-minerilization for necessary fertilizing/over-fertilizing downstream land affecting its BII. But these effects are only indirect and only applicable in very specific ecosystem and not considered common	0	BII on land is probably not strongly coupled to BI freshwater	b) a) c) d) -> a) and b) direct effects while c) inidrect effect via anthropogenic change of pressures	no
Bifresh_Biland	Exp26	no	50	100	80	100	No	Reduction in fish biomass directly affects feed for land predators and birds. The extend is more than unclear, though.	0	I cannot reasonably answer this question. It would be a blunt guess.
Bifresh_Biland	Exp29	no	56.6667	83.3333	70	100	European rivers	Many terrestrial species depend on intact freshwater systems for food consumption and reproduction.	0.4	Many freshwater species tend to reproduce in relatively large clutch sizes, making tipping points relatively hard to cross. I therefore expect that more than half of fish biomass would need to be lost before such tipping points are lastingly noticeable
Bifresh_Biland	Exp37	no	61.4286	94.2857	90	100	No	The worst situation BII on nearby land will change with fish biomass in freshwater ecosystems linearly.	0.78		acbd	No
Bifresh_Biland	Exp40	no	63.5714	99.2857	85	100	no	Some on land animals will derive their food from the freshwater ecosystem	0.4	Likely to reach a tipping point before K = 0	c), b), a), d) As per my initial answer, and after consulting with the Slack discussion, I feel that food availability is likely to be significantly more important than the other dimensions. Of course, the effect on BII land will depend upon which animals are effected by the loss in freshwater fish biomass (i.e. their role in the terrestrial food chain, ecosystem)	Unlikely to cascade across a wider area, but could have potential cascading impacts on ecosystem functions, for example, where bear populations decline (i.e. impacts of reduced salmon populations won't only be confined to the bear population)
Bifresh_Biland	Exp45	no	89.7778	95.3333	92	100	-	there are food web interactions from fish in freshwater to land systems via birds, macrophyte interactions etc., though surely small except in specific locations	0.1	set very low as I do not except strong interaction, nonlinearities	put c) before b) as I think this is relevant in more cases
Bifresh_Biocean	Exp12	no	0.575	0.825	0.7	100	See above	Change in flow of materials and energy from freshwater to marine systems.	0.4	I think this would vary dramatically - would depend on freshwater inputs e.g. round mouth of Amazon much greater impact than in areas with few freshwater inflows
Bifresh_Biocean	Exp16	no	0.8	0.8	0.8	100	no specific region	Not certain about any link	0
Bifresh_Biocean	Exp23	no	0.6	1	0.8	100	no	Coupling only in rare cases where freshwater biomass of certain species act as importnat food source for coastal fish or influence geochemical flows to coastal waters.	0.01	Very weak coupling and only indirect effects	a) d) -> almost similar as both are 'material flow' needed for coastal areas c) e) b) -> specific effect of e)	no
Bifresh_Biocean	Exp29	no	0.673077	0.826923	0.75	100	Northern oceanic regions such as the Atlantic and the Pacific	Many freshwater fish species move or disperse through the ocean during some part of their life history. During this time they will likely have influence on key ocean fish species. An example is for instance the predatory salmon who migrates through ocean from his freshwater spawning ground.	0	It is likely that other species fill niches left by the lost freshwater species. So unlikely that there are tipping points
Bifresh_Biocean	Exp37	no	0.544286	0.801429	0.73	100	No	It depends on importance of freshwater ecosystems on the connecting coastal ecosystems. If it is very important, the fish biomass in connecting coastal ecosystems will change a lot.	0.73		acbde	No
Bifresh_Biocean	Exp40	no	0.389474	0.810526	0.6	100	Lake Chilika, India	The alteration depends on the predation and interaction between coastal and freshwater species. For example, if there are weak interactions (e.g. no freshwater to coastal migration) then there may be no change on the coastal ecosystem in contrast, tighter coupling may lead to a knock on effect on coastal food availability and nutrient cycling. There may also be secondary effects if socioeconomic …	0.5	Just a best guess based on a declining density and population of freshwater species and their interactions with coastal species	b), e), d), c), a) Could be a difference in scale here. The direct impacts of predation and food availability are likely to have a greater impact on keystone fish biomass - at least in the short-term. However, the geochemical/nutrient conditions of the habitat may have longer-term implications i.e. lock the system into an alternative state / work against the recovery of the coastal biomass.	Question of scale, I think. Would depend on the migratory range of the coastal biomass; i.e. could the decrease in their biomass cause knock-on effects on fish communities in neighboring regions...
Bifresh_Biocean	Exp41	no	0.414286	0.985714	0.7	100	Australia, Americas, SE Asia	Marine fish often have a good deal of flexibility in diet so should be able to shift so long as not a true obligate (or not the same species, different life history stage) and other forage is available	0.3	It is when you start to see drops in true production that non-linear flow on would be strongest. However, life history will strongly influence this and changes may be seen earlier	Depends on the specific system. If I had to choose (which Id on't really want to) I would say d,a,c,b,e . However this is not really useful information for you I fear because 1. there is no real difference in those grades in my head. 2. Energy and material transfer includes all the other options as different types of transfers (bit like hierarchical definitions); geochemical flows technically inc…	Potentially- both through plume footprint of estuarine/river outflow to ocean but also because individual species within the estuarine overlap of freshwater and coastal species can have larger dispersal footprint or form parts of webs that have larger footprints.
Bifresh_Biocean	Exp45	no	0.6375	0.7625	0.7	100	just where up-/downstream ecological interactions are strong, which in this way or the other may be relevant in many places	Species composition upstream may well connect to downstream areas through food web interactions, migrations	0.4	That may be a level with very strong reductions upstream, respectively producing strong effects downstream in coastal-near areas
Bifresh_LSC	Exp14	no	83.3333	96.6667	90	100	I would expect to see this more at temperate and tropical systems, as boreal has lower productivity	I'm not sure if there will be a significant change. A decline in protein could affect terrestrial animal food, which also declines, then vegetation would increase. I would expect to see this more at temperate and tropical systems, as boreal has lower productivity	0.2	I think that fish would almost have to disappear before forest cover changed. I'm not certain that a tipping point would occur here	d) seems the only reasonably mechanism, then a), then b) then c)	No, I don't think so
Bifresh_LSC	Exp16	no	90	90	90	100	No specific region in mind	No obvious link	0
Bifresh_LSC	Exp18	no	51.6667	93.3333	85	100	Amazon River floodplain	We must consider herbivores, detritivores, invertivores and omnivores as keystone biomass here, as they are positively associated with forest cover. Piscivores and planktivores on the other hand are negatively associated, so wont be the focii of my analysis, but must be included as 'keystone' in the greater freshwater ecosystem. Beta diversity findings for the Amazon river indicate species turnov…	0		b, a, c, d
Bifresh_LSC	Exp23	no	82	100	90	100	no	Very unlikely to have any effect	0	No effect	b) (with d) being special case) : freshwater system important for buffering nutrient imbalances that may change forest composition c) a) -> not sure about connecting here	No
Bifresh_LSC	Exp24	no	88.2222	90	90	100	Coastal forests of British Columbia	I know that forests on the British Columbia coast benefit from (rely on?) nutrient inputs from the salmon runs. But I still think the impact will be small.	0		b
Bifresh_LSC	Exp29	no	83.3333	90	90	100	Tropical and Temperate riverine forests	Freshwater fishes will likely only alter terrestrial forest cover if they are influencing seedling recruitment or nutrient supply. Both however has likely very limited influence on forest cover as such	0
Bifresh_LSC	Exp37	no	53	93	85	100	No	The worst situation is nearby forest cover will change with fish biomass in freshwater ecosystems linearly.	0.75		abcd	No
Bifresh_LSC	Exp40	no	77	95	85	100	No	Having read the slack discussion, I still feel that the interactions here will be weak (even without social-ecological feedbacks).	0.2
Bifresh_LSC	Exp45	no	89.1579	90	90	100	-	I cannot imagine a significant interaction here	0	set 0 because no interaction assumed	I would but c) first and d) second, as these are the only interaction I understand (still minor and indirect). Hence I slightly changed my values above.	to a very small extent via interaction c)
Bifresh_Biog	Exp14	no	0.5	0.5	0.5	100	No	No interaction (from slack discussion updated)	0	There is unikely to be a tipping point for this interaction	N/A	N/A
Bifresh_Biog	Exp16	no	0.5	0.5	0.5	100	no specific region	I think causality is other way, N flows impact freshwater biodiversity	0
Bifresh_Biog	Exp23	no	0.5	0.5	0.5	100	No	Not likely	0	No influence
Bifresh_Biog	Exp25	no	0.5	0.5	0.5	100	Anyone	I cannot see a clear effect of freshwater keystone fish biomass on N concentration in upland runoff water	0		Agree
Bifresh_Biog	Exp37	no	0.44	0.65	0.6	100	No	The worst situation leached nitrogen concentration in runoff in nearby areas will change with fish biomass in freshwater ecosystems linearly.	0.78
Bifresh_Biog	Exp48	no	0.35	0.55	0.45	100	None.	Decrease in fish species could change the composition of living organisms in the river	0.5	The process is highly non-linear
Bifresh_Blue	Exp11	High	51.7857	80.3571	62.5	100	Yahara River Watershed, Wisconsin	I would guess that a decrease in keystone fish biomass would lead to a general degradation of the aquatic ecosystem, and a corresponding change in channelization and flashiness. This could either lead to an increase in flows or a decrease in flows depending on the ecosystem. I was thinking here about an ecosystem where a collapse of the keystone fish (driven by an invasive species) has led to an …	0.8	I would guess this would be nonlinear regardless of the fish biomass, and have a generally sigmoid shape. At very high levels of fish biomass, decreases would have relatively little impact on flow. As fish biomass decreased, the impacts on flow would increase, then decrease once biomass got to very low levels and eventually have no additional effect.	a,b - channelization would probably be a more general response across many regions than turbidity-induced changes in discharge	Yes, because all of these processes describe effects on a river system, they could have impacts on discharge not just in the region of interest but anywhere downstream.
Bifresh_Blue	Exp11	Low	80.8333	110	97.5	100		Similar to my high flows answer, I think this would depend a lot on the ecosystem. But in the case of low flows, in the example I was thinking of, there is generally less erosion and a more clogged stream channel so flows increase a bit.	0.8	Same answer/relationship as high flows. I would guess this would be nonlinear regardless of the fish biomass, and have a generally sigmoid shape. At very high levels of fish biomass, decreases would have relatively little impact on flow. As fish biomass decreased, the impacts on flow would increase, then decrease once biomass got to very low levels and eventually have no additional effect.
Bifresh_Blue	Exp14	High	58.2	67	63	100	No	A decline in fish would lead to a decline in ecosystem, function, including nutrients, primary production etc. I'm not certain however how this would lead to a reduced flow during high flow	0	I don’t think a tipping point will be reached	b) > a)	No
Bifresh_Blue	Exp14	Low	82	100	90	100		Difficult to see how a decline in fish stocks would lead to a decline in freshwater flow, unless perhaps in endorheic regions. But during low flow, this might be more susceptible to ecosystem change in lakes and river banks	0.2	Perhaps a tipping point could be reached if fish declined in an endorheic region, where if ecosystem function was disrupted, more evaporation from lakes and surface waters could result in a low flow decline	(Probably the same answer for here)
Bifresh_Blue	Exp16	High	65	65	65	100	no specific region	Link is other way around. Streamflow affects fish	0
Bifresh_Blue	Exp16	Low	95	95	95	100		Link is other way around. Streamflow affects fish	0
Bifresh_Blue	Exp21	High	44	70	60	100	Dammed water ways in the Great Plains and Rocky mountains of the united states	Struggled a bit with this. But declining fish populations particularly if popular with sport fisherman, could galvanize public sentiment to maintain discharge rates for recreational activities	0	I don't have a good estimate for this	B A
Bifresh_Blue	Exp21	Low	78.5714	97.1429	90	100		No strong reason to alter low vs high flow	0	I don't have a good estimate for this
Bifresh_Blue	Exp23	High	65	65	65	100	no specific region	No effect expected	0	No thershold expected	a) b)	no
Bifresh_Blue	Exp23	Low	95	95	95	100		No effect expected	0	No thershold expected
Bifresh_Blue	Exp24	High	65	65	65	100	no specific region	I cannot think of a mechanism for this interaction	0
Bifresh_Blue	Exp24	Low	95	95	95	100		I cannot think of a mechanism for this interaction	0
Bifresh_Blue	Exp26	High	65	65	65	100	no specific region	I don't think there will be a significant response.	0
Bifresh_Blue	Exp26	Low	95	95	95	100		I don't think there will be a significant response.	0
Bifresh_Blue	Exp37	High	26.2	65	63	100	no specific region	The worst situation high flow season discharge in nearby freshwater ecosystems will change with fish biomass in freshwater ecosystems linearly.	0.78		ab	No
Bifresh_Blue	Exp37	Low	56.8	96	92	100		The worst situationlow flow season discharge in nearby freshwater ecosystems will change with fish biomass in freshwater ecosystems linearly.	0.78
Bifresh_Blue	Exp45	High	64.1111	65	65	100	none	I cannot imagine a significant feedback in this direction, hence I assume the current value does not change	0	(just an arbitrary 0 as no such effect expected)	ranking okay; I assume these to be minor effects ocurring only under special conditions
Bifresh_Blue	Exp45	Low	93.1111	95.1111	94	100		There may be some minor feedbacks in specific circumstances but really minor so I would not assume a noticeable change	0	(just an arbitrary 0 as no such effect expected)
Bifresh_Blue	Exp49	High	65	65	65	100	none	I can't identify a process based link between changes in fish biomass in freshwater ecosystems and altered flow in the high or low season, which is generated upstream in terrestrial ecosystems.	0
Bifresh_Blue	Exp49	Low	95	95	95	100		I can't identify a process based link between changes in fish biomass in freshwater ecosystems and altered flow in the high or low season, which is generated upstream in terrestrial ecosystems.	0
Bifresh_Green	Exp11	no	73.2692	96.3462	92.5	100	Yellowstone National Park reintroduction of wolves trophic cascade	I think there would be a response driven by a change in overall ecosystem dynamics, but it is hard to envision what it is, and once again I would expect it to be very site-specific. In general, the degradation of freshwater ecosystems would probably also decrease the integrity of terrestrial ecosystems that depend on them, which would lead to... some change in soil moisture, but I can't put my fi…	0	I am too uncertain to guess about a tipping point.	b,c,a	I think all of these mechanisms would be pretty weak, all things considered. But, for any impacts on soil moisture or vegetation, those could then cause changes in ET which could have cascading downwind impacts on precipitation.
Bifresh_Green	Exp13	no	79.8586	96.0202	94	100	no	Interactions through animals could be more surprising than I thought previously as, for example, through beaver populations, but surely there would be other examples	0.4	difficult to say, but I do think non-linearity is possible now	c,b,a	Sure, through migration of species, or more specifically limiting possibilities of doing so.
Bifresh_Green	Exp14	no	88	98	92	100	No	A loss of fish, and concomitant decline in ecosystem function would see a decline in nutrient export, and potential impact on vegetation downstream.	0	I don't think that a decline in fish will lead to a tipping point for green water	c) > b) > a)	I'm not sure
Bifresh_Green	Exp16	no	95	95	95	100	no specific region	Cant see any link here	0
Bifresh_Green	Exp24	no	95	95	95	100	No	I cannot think of a mechanism for this interaction	0
Bifresh_Green	Exp26	no	95	95	95	100	no	I don't think there will be a significant response.	0
Bifresh_Green	Exp23	no	95	95	95	100	no	No effect expected	0	No thershold expected	a + b) are similar with a) including an extra step c) -> not sure how keystone fish biomass can influence beavers that are primarily vegetarians and only feed on plant biomass. Where is the connection?	no
Bifresh_Green	Exp37	no	47	95	93	100	No	The worst situation growing season soil moisture on nearby land will change with fish biomass in freshwater ecosystems	0.77			bac
Bifresh_Green	Exp45	no	95	95	95	100	-	no interaction, in my view	0	(arbitrary 0 value, no such tipping point)	ranking okay, but as the list of interactions shows, it is all quite special and propagating effects, probably only in specific small locations...	...hence I assume no large-scale effects
Bifresh_Green	Exp49	no	95	95	95	100	none	I can't identify a process based link between changes in fish biomass in freshwater ecosystems and altered soil moisture on nearby land.	0
Biocean_Biland	Exp16	no	93.6667	95	95	100	Coastal region generally	Mostly terrestrial biodiversity not impacted by marine biodiversity, except maybe some coastal birds	0
Biocean_Biland	Exp21	no	70	100	90	100	No	I think that a decline in oceanic BII would have a negative impact on BI land, but I think it would be less of a direct impact than the changes in BI freshwater	0	I don't have a good estimate for this	A) B) C)
Biocean_Biland	Exp23	no	93	97	95	100	No	Decrease in keystone fish species will probably have no effect on nearby land BII, except for specific cases as e.g. marine Mangrove forests	0	In general changes in marine systems rarely affect nearby land systems	b) c) a)	no
Biocean_Biland	Exp26	no	40	98	90	100	No	Birds feed on coastal fish.	0	I cannot answer this question in a credible way.
Biocean_Biland	Exp29	no	87.7778	95.5556	90	100	Overfishing in coastal areas of the world	A decrease in ocean fish biomass likely results in direct losses of terrestrial BII because many terrestrial birds and mammals are directly depended on fish caught in the ocean.	0.6	More adverse impacts are expected already at a 40% reduction in fish biomass. This mirrored by many long-term studies of seabird colonies who showed a decline of young pubs and increases in the flight duration of adults to catch fish.
Biocean_Biland	Exp37	no	48	96	92	100	No	The worst situation is that BII on nearby land change with fish biomass in coastal ecosystems linearly.	0.79		abc	No
Biocean_Biland	Exp41	no	56.6667	98.3333	90	100	Australia, Americas, Antarctic, SE Asia, Sth Africa	There is a cross flow of marine materials into coastal systems, if they can't be replaced as stocks go down then energy and nutrient flow changes, modifying the local system structure	0.4	This is species specific, so may be higher for sedentary or long lived species. But in the main for productive mass spawners population biomasses can drop a lot before system function shifts. Part of the confusion/frustration in answering this is keystone can be a misleading word in marine systems where structure can be highly fluid and compensatory, especially in sub-tropical and tropical system…	In most systems not dominated by mangroves I'd say c then b but only marginally as in reality it is food delivering the energy/nutrient flow in the main. In mangrove forests the mangroves (a) would jump to top of the list given food, energy, coastal protection they provide. Once again all really interconnected and system dependent	Yes. Again it depends on the system structure and dispersal agents, but it is possible if the terrestrial groups being subsidised are highly dispersive (including human users or predators) or indeed if something offshore is coming nearshore and being accessed by something terrestrial. There is also a another route. There is increasing evidence that marine plankton are a thermal sink as well as cl…
Biocean_Biland	Exp48	no	45	105	75	100	None.	Given food chain and water quality condition, the impact could be large.	0.95	There are lots of indirect impacts (tends to be non-linear) between land and ocean interactions.
Biocean_Bifresh	Exp16	no	0.8	0.8	0.8	100	no specific region in mind	There may be some exceptions, but I think marine biodiversity will not normally impact freshwater biodiversity	0
Biocean_Bifresh	Exp29	no	0.6	0.8	0.8	100	Atlantic and Pacific intertidal and coastal areas	Some coastal fishes likely prey upon other keystone freshwater fishes in connecting ecosystems. Yet, the overall influence of this is likely relatively small.	0	It is unlikely that such tipping points exist as other species will fill the niche of species lost
Biocean_Bifresh	Exp37	no	0.42	0.82	0.78	100	No	The worst situation is that fish biomass in connecting freshwater ecosystems will change with fish biomass in coastal ecosystems linearly. Generally speaking, the change follows the direction of water.	0.78		bca	No
Biocean_Bifresh	Exp41	no	0.292857	0.864286	0.65	100	Americas, Australia, SE Asia	Estuarine and coastal fish can see nutrients returned to watersheds through direct migration of bird and predator mediated flow. A change/collapse in coastal fish stocks could then feed back to the rivers through loss of migration or loss of the predator mediated dispersal	0.45	Productivity of non-sedentary species typically allows for strong reduction in biomass before processes are impacted	c,a,b q=would be the best known. But again it is system dependent so could simply be a,b as no anadromous (or indeed catadromous) fish in the system :)	If anadromous/catadromous dependent by definition it involves larger scale processes. However on the freshwater side I guess it would depend on the extent of the freshwater system (whether delta, large river system or lakes rather than a single small waterway).
Biocean_Bifresh	Exp23	no	0.76	0.86	0.8	100	May be relevant for Nordic regions	Changes in coastal waters usually does not affect upstream keystone fish biomass in freshwater system (and if only in very rare cases through indirect feedbacks) However, for salmon dominated systems this is very important as they are often the keystone fish species in fresh waters as young fishes and partly adult but as they spend most of the time until spawning in the ocean as a potential keyst…	0.5	Given the above said salmon dominated species in Nordic river systems that might be of great importance there	c) -> only affects certain species in specific regions, however they are essential for ecosystem functioning a) b) -> very specific	No
Biocean_LSC	Exp16	no	90	90	90	100	No specific region	Can't see any connection	0
Biocean_LSC	Exp23	no	80	100	90	100	no	Most likely no effect	0	No effect	c) + b) -> both identical with nutrient flux the more general terminology d) a) -> not sure about connection here	No
Biocean_LSC	Exp24	no	87.7778	90	90	100	Coastal forests of British Columbia	I know that forests on the British Columbia coast benefit from (rely on?) nutrient inputs from the salmon runs. But I still think the impact will be small.	0
Biocean_LSC	Exp29	no	88.5714	90	90	100	Maybe	It is highly unlikely that ocean fish species influence the recruitment and growth of nearby tree cover. I could only imagine some mild interactions in coastal ecosystems such as mangrove forests, where some fish species could fertilise mangrove plants or disperse seeds. However this interaction will at best be very small.	0
Biocean_LSC	Exp37	no	43	91	87	100	No	The worst situation is nearby forest cover will change with fish biomass in coastal ecosystems linearly.	0.77		bcad	No
Biocean_LSC	Exp40	no	68.8889	91.1111	80	100	No	I would like to revise down my answer after the previous round, now that I understand social-ecological interactions are not the focus here :) Agreeing with the wider slack discussion, I can't think of any significant links between BII ocean and forest cover, over than the roles of certain fish species in the dispersal of seeds in particular environments (e.g. mangrove forests of Bangladesh)	0	No effect	a), b), c), d)	No
Biocean_Biog	Exp16	no	0.5	0.5	0.5	100	No specific region	Can't see any connection	0
Biocean_Biog	Exp23	no	0.5	0.5	0.5	100	no	No effect	0	no likely effect	b) a) -> very special case	N runoff may have consequenes for ocean ecoystems, creatin anoxic zones, changing atmospheric CO2 uptake
Biocean_Biog	Exp24	no	0.473333	0.5	0.5	100	Coastal ecosystems of British Columbia	I know that forests on the British Columbia coast benefit from (rely on?) nutrient inputs from the salmon runs. But I still think the impact will be small.	0
Biocean_Biog	Exp25	no	0.5	0.5	0.5	100	Anyone	I cannot see a clear effect of coastal keystone fish biomass on N concentration in upland runoff water.	0		b, a In my opinion, the mechanism a) results very improbable at the estimated range of changes b) Fewer keystone species does not always mean less fish biomass for birds if other opportunistic species are rising	Huge guano concentrations can be a source of N used as a fertilizer in other regions, the scale depends on the range of the flow. Anyhow this guano could replace other fertilizers. Very difficult to say...
Biocean_Biog	Exp37	no	0.51	0.72	0.53	100	No	The worst situation is that leached nitrogen concentration in runoff in nearby areas change with fish biomass in coastal ecosystems linearly.	0.78		ab	No
Biocean_Blue	Exp11	High	63.9474	66.0526	65	100	West coast of North America	I don't think there would be any impact of changes in coastal ecosystems on river flow. The only indirect mechanism I can think of would be in rivers with anadromous fish such as salmon, where a decline in salmon populations may lead to a decreased ocean-land nutrient flux and therefore a degradation of riparian ecosystems. But even in that example, I cannot envision a significant change in flow.	0		a	Because this mechanism relies on sea to land migration, it would have effects at the scale of an individual watershed (or multiple watersheds), and effects would go as far upstream as the fish typically migrate.
Biocean_Blue	Exp11	Low	93.9474	96.0526	95	100		Same response as for high flow season: I don't think there would be any impact of changes in coastal ecosystems on river flow. The only indirect mechanism I can think of would be in rivers with anadromous fish such as salmon, where a decline in salmon populations may lead to a decreased ocean-land nutrient flux and therefore a degradation of riparian ecosystems. But even in that example, I cannot…	0
Biocean_Blue	Exp12	High	65	65	65	100	No	Not connected	0
Biocean_Blue	Exp12	Low	95	95	95	100		Not connected	0
Biocean_Blue	Exp16	High	65	65	65	100	No specific region	Can't see any connection	0
Biocean_Blue	Exp16	Low	95	95	95	100		Can't see any connection	0
Biocean_Blue	Exp24	High	65	65	65	100	No	Cannot think of a mechanism	0
Biocean_Blue	Exp24	Low	95	95	95	100		Cannot think of a mechanism	0
Biocean_Blue	Exp23	High	65	65	65	100	no specific region	No effect expected	0	No thershold expected
Biocean_Blue	Exp23	Low	95	95	95	100		No effect expected	0	No thershold expected
Biocean_Blue	Exp37	High	27.6154	64.5385	63	100	No	The worst situation is that high flow season discharge in nearby freshwater ecosystems change with fish biomass in coastal ecosystems linearly	0.78		a	No
Biocean_Blue	Exp37	Low	54.6667	94.6667	93	100		The worst situation is that low flow season discharge in nearby freshwater ecosystems change with fish biomass in coastal ecosystems linearly	0.78
Biocean_Blue	Exp49	High	65	65	65	100	none	I can't identify a process based link between changes in fish biomass in coastal ecosystems (downstream) and altered flow in the high or low season, which is generated upstream.	0
Biocean_Blue	Exp49	Low	95	95	95	100		I can't identify a process based link between changes in fish biomass in coastal ecosystems (downstream) and altered flow in the high or low season, which is generated upstream.	0
Biocean_Green	Exp11	no	93.9474	96.0526	95	100	I was thinking of the Puget Sound/Salish Sea region surrounding Victoria.	I don't believe there would be a relationship here. I can envision an indirect relationship mediated through one of the land system change PB if coastal fish biomass decreases in a region that is strongly dependent on fish as a protein source, they may require additional agricultural land use to compensate for this loss in protein, which would affect green water. However, I do not see a direct co…	0	No tipping point because I do not believe there is a relationship.	b,a	Yes, there could be downwind impacts (outside the watershed affected by anadromous migration) if soil moisture changes led to ET changes and impacts on moisture recycling.
Biocean_Green	Exp12	no	95	95	95	100	No	fish biomass in ocean wont affect soil moisture	0
Biocean_Green	Exp13	no	94.4949	95.101	95	100	no	no interaction	0	no tipping	b,a	no, and I think a is a bit of a stretch that is not likely to be a significant effect
Biocean_Green	Exp16	no	95	95	95	100	No specific region	Can't see any connection here	0
Biocean_Green	Exp24	no	95	95	95	100	No	Cannot think of a mechanism	0
Biocean_Green	Exp23	no	95	95	95	100	no	No effect expected	0	No thershold expected	b) a) -> how do fsh biomass regulate microclimate?
Biocean_Green	Exp37	no	48	96	92	100	No	The worst situation is that growing season soil moisture on nearby land change with fish biomass in coastal ecosystems linearly	0.78		ab	No
Biocean_Green	Exp49	no	95	95	95	100	none	I can't identify a process based link between changes in fish biomass in coastal ecosystems (downstream) and altered soil moisture on nearby land.	0
LSC_Biland	Exp10	no	76.6667	93.3333	85	100	none	Forest cover clearly affects BII through a reduction in habitat, which could be close to proportional	50	High levels of forest cover loss required for a tipping point	a c b d Suitable habitat (mechanism a) is most important because habitat is such a fundamental constraint on biodiversity (the niche). Secondly, restoring abiotic processes (c) is also very important to a functioning ecosystem. Fragmentation effects are less important than these two.	Likely local effects, though at a big enough reduction forest cover changes can affect the global climate cycle
LSC_Biland	Exp14	no	55	95	75	100	Tropical regions will have a much higher decline in BI Land than say taiga forest	A loss of habitat will have a much greater impact on BI Land than many other drivers. In an area of 100km2 we might expect the edge effect to be quite major too. But loss of forest cover would lead to loss of ecosystem function. Of course, depending on what it is replaced with is important, but I don't think you are looking for that speculation?	0	I've put no tipping point here, as I think that forest loss will lead to a gradual and continuous loss in biodiversity intactness index	a>d>c>b I put b last, as would a loss of ecosystem integrity lead to an in increase in terrestrial biodiversity?	No
LSC_Biland	Exp16	no	70	106	90	100	no specific region	Losing forest might reduce biodiversity. However, a more diverse land cover might increase biodiversity	0
LSC_Biland	Exp17	no	38.5714	72.8571	70	100	probably a mid-latitude forest.	I think that there is a > than 1:1 relation between forest cover and BIl - at best, if 80% is significantly ahead of a tipping point, then this relation is close to 1. At worst, if the tipping point is ahead of 80% forest cover, then this value will be higher.	65	I think this might reflect a median value, where the exact tipping point will depend vastly on the location, type, and age of forest and its history and surroundings etc. Also, I think the rate of deforestation will play an important role in shaping the effects on BIl, where rapid forest cover loss will probably have more sudden though potentially delayed impact on BIl compared to slow, gradual f…	a-c-d-b : this will vary, I guess I rank lower those for which the principles vary the most, i.e. in b, some level of landscape heterogeneity can promote diversity, I don't think it's a linear relationship. Also, I think forest cover isn't the best resolution for a variable, some forests are more diverse genetically and functionally than others, in which case the effect of landscape heterogeneity…	I think ecosystem fragmentation can play a role in creating cascading shifts – regional level. Climate, water and biogeochemical flows have global cascading effects (see for instance work on precipitationsheds, by and with Keys et al).
LSC_Biland	Exp21	no	66.6667	108.333	75	100	Amazon rainforest.	Declining forest cover is also accompanied by fragmentation, which further reduces ecosystem integrity	65	Forests can create their own microclimates. If forests are diminished then this may lead to collapses (e.g. amazon rainforest and generation of precip)	A) B) C) D)
LSC_Biland	Exp23	no	46.6667	102.222	80	100	No	Local land use change will have affect on BII directly by land conversion profoundly not only through habitat loss but also changing water, climate, biogeochemical flows)	20	Converting land from forest usually includes a radical change away from original state. Thus very small changes are possible without profoundly changing the original state of the system (incl its resilience capacity)	a) d) b) ->a) b) d) local effect mainly affecting BI and geochemical flows c) -> large scale effect	Yes, b) forst cover changes biogeochemical conditions downriver thus can propagate effect More essential climate effect of forest cover change to climat especially the water cycle -> forest cover change determines downwind precipiation elsewhere, forest cover change also changes water buffering capacity to provide constant precipitation downwind. this can lead to downwind long lsting changes in p…
LSC_Biland	Exp24	no	83.3333	96.6667	90	100	Tropical and subtropical forests	The mechanism is habitat loss. According to this publication (https://www.biorxiv.org/content/10.1101/311688v3.full), in tropical & subtropical biomes, the proportional decrease in BII was about half the proportional decrease in forest cover. This is just an average estimate of course, I imagine there is huge context dependency.	30	I can't point to a particular study, but I have heard colleagues who study biodiversity say that 30% seems to be a threshold for biodiversity collapse.	a (I think the primary mechanism is simply habitat loss), b, c/d	Studies have shown that tropical deforestation can result in climate changes elsewhere through teleconnections. This may not be a cascade across scales though, just non-local effects.
LSC_Biland	Exp26	no	75	101	85	100	No	The answer would depend on what the forest is being replaced with. But reduction in forest cover directly affect BII as it is the natural habitat for most species.	0	I cannot answer this question without local context and a simple model.
LSC_Biland	Exp29	no	70	90	85	100	Global. Deforestation frontiers in Brazilian Amazon	All current estimates of BII are calculated from contrasts in land use and land cover. A loss of forest cover would therefore most likely lead to a proportional loss of BII because of habitat loss. Because of forest fragmentation and subsequential loss of population fitness, these estimate might be lower than what I estimate. My estimates are also in average comparable to the mean modelled estima…	40	At a certain level of forest cover loss, the forested ecosystem most closely resembles a forest stops being a forest, resulting in the loss of most forest-associated species. This reference here suggest that beyond 40% loss of forest cover a threshold has been reached https://onlinelibrary.wiley.com/doi/full/10.1111/ele.13535
LSC_Biland	Exp32	no	87.87	98.5533	92.62	100	No, but 60% of the ecoregions (in total area) that met the specified condition were in Brazil, DR Congo, China, Canada and Russia.	The values are based on the results of Usubiaga-Liaño et al. 2019 (https://www.nature.com/articles/s41893-019-0300-8). In short, the model used tries to meet the 90% BII value in every ecoregion by changing land uses to increase/decrease biodiversity (depending on whether the initial BII value was higher/lower than 90%). For that it uses the biodiversity response factors from Newbold et al. 2015 …	0	The model assumes linear changes for BII reductions as a result of land use changes.	a-b-c-d	c. There is literature on tipping points for habitat change in tropical forests (e.g. the Amazon partially becoming a savannah), but this is not part of my expertise. Other experts will certainly provide reasonable estimates
LSC_Biland	Exp35	no	74.6154	94.6154	90	100	central europe amazon rain fores	Modest deforestation will most likely not affect species abundance too radically. However, depending on where and how the landscape is converted, important habitats can be lost. However, habitat connectedness will likely not be affected too much.	60	I would assume that at 60%, deforestation can cause major landscape fragmentation, leading to a reduced gene-flow and thus adaptability, thereby reaching a non-linear population bottleneck.	1. a -> 2. d -> 3. b -> 4. c Mechanism a) and d) are very similar since a higher land cover diversity equals a higher niche abundance and diversity which in turn provide habitats. I think that the mechanisms provided above operate on very different temporal and spatial scales. Temporal: a) and d) have a direct impact and bear the potential to cause changes in BII within a few generations of the r…	b) and c) can potentially affect the BII on more than just nearby land. While ecosystem fragmentation is still a predominately regional phenomenon, changes in water and biochegeomical flows can trigger large scale cascading effects with potentially global consequences (e.g. amazon dieback).
LSC_Biland	Exp37	no	70.7143	92.1429	85	100	No	Forestland is very important to keep biodiversity intactness, the forest cover decrease will change BII severely.	80		abdc	No
LSC_Biland	Exp39	no	53.75	128.75	85	100	No	Decrease of BII in Tropical rainforest, increase in temperate forests	100	I think the interaction is non-linear in general
LSC_Biland	Exp42	no	85.8333	95.8333	90	100	No	Using species richness as a proxy, the countryside species-area relationship suggests that species richness initially decreases slowly and only later much quicker, and that species might still have some affinity for the converted habitats although this affinity is lower than for the natural habitat, i.e. here the forest.	40	See above	a, c, b, d	Depends on the dispersal distance / mobility of the species, as the species might migrate to other areas and increase competition there; if the water flows area changed, it can also affect the downstream area of the catchment
LSC_Biland	Exp44	no	0	35	15	100	Europe, where habitat is very limited and BII descreases faster than habitat	due to BII definition the impact is often small. but normally more than linear with habitat loss due to indirect impacts, maybe first less than linear, later on more than linear	70	we are currently beyond the tipping point already, any further habitat loss leads to more than linear BII loss in most regions
LSC_Biland	Exp46	no	40	98.3333	90	100	None	The value of BII would depend greatly on what land use the forest was converted to, what condition the forest was that was lost, how far away the forest is from the "nearby land" that BII is being assessed, what region the forest loss occurs	50	When forest cover drops below 50%, further losses may have stronger impacts on BII since there will be far fewer source populations/resources/refugia nearby to support populations (particularly mobile species).
LSC_Biland	Exp45	no	77.5	96.25	90	100	Amazon, boreal zone	BII and forest cover are very strongly linked, so the interaction values should be high, with quite high confidence	65	Surely depends on the region, but forest cover loss of about a third (65% remaining) may seriously affect BII and induce wider spreading of forest cover loss due to fragmentation, reduced moisture recycling, climate feedbacks etc.	I agree with this nice list of interactions and their ranking	interactions of type c) could, over any area where the climate effect would still be discernible
LSC_Bifresh	Exp14	no	0.5	0.9	0.7	100	Regions were forests and rivers are closely tied together, eg amazon	A decline in forest cover will lead to major alteration in catchment habitat around lakes, with concomitant impact on nutrients entering the lake hence fish. Several studies have shown a direct relationship between forest cover and fish biodiversity eg in the Amazon (Arantes et al. 2017; DOI: 10.1111/1365-2664.12967)	0		f,c,b,a>e>d	I don't think so
LSC_Bifresh	Exp16	no	0.73	0.813333	0.78	100	no specific region	Loss of forest cover might lead to more sediment and nutrient in freshwater that impacts freshwater biodiversity	0
LSC_Bifresh	Exp18	no	0.49875	0.889375	0.78	100	Amazon river floodplain	Herbivores, detritivores, invertivores and omnivores are positively associated with forest cover, whilst piscivores and planktivores are negatively associated with forest cover. beta diversity is positively associated with forest cover. Many species which would usually be considered habitat generallists tend be be identified in areas dominated by herbaceous vegetation or open water (i.e. would no…	5	For the lower Amazon, forest cover is currently only 13%, with herbaceous vegetation being the primary biome. Detritivores, invertivores, etc feed mostly by ingress into flooded forest regions, absorbing runoff & seeds. Whilst threatened, the current level of cover is sustaining the various populations.	, a, e, b, d, f I've ranked f last, since I don't feel the direction indicator is correct. I expect a decrease in functional diversity, but an increase in a few indicator species - as a whole biomass would probably go up for a time.	I struggle to identify a cascade scenario, but I don't think it's something we have adequate understanding of at present.
LSC_Bifresh	Exp20	no	0.682857	0.825714	0.74	100	no	I expect little change	50	Would need to be a pretty big change. Generally don't even see a hydrologic signal until 20% of a watershed is converted
LSC_Bifresh	Exp23	no	0.05	0.45	0.35	100	No	Changes in forest cover will have influence on nearby water ecosystem by changing run-off, potential change of turbidity through soil erosion and change in geochemical flows. Morevoer, structual changes in forest cover can lead to decreased water retention resulting in higher water currents and increased river run-off.	80	Dense forest as an ecological function unit is defined as 80-100% tree cover. Below that it is open forest with different characteristics	c) b) d) a) e) f)	No
LSC_Bifresh	Exp34	no	0.8	0.8	0.8	100	not really	I just don't think there is going to be a large impact of a small decrease in forest cover on keystone fish biomass in most cases. I guess I'm picturing this forest loss happening over a whole watershed (not right along the bank of the river where fish are living) and that the fish are not necessarily temperature sensitive. (e.g., this answer could be quite different if I'm thinking about trout i…	50	IT is a guess based on how much forest would have to be lost for the losses to start affecting the area right around a stream or river where fish are living.
LSC_Bifresh	Exp37	no	0.7	0.816667	0.75	100	No	forest can increase heterogeneity in physical structure and food materials in freshwater habitats.	80		defcba	No
LSC_Bifresh	Exp45	no	0.72	0.82	0.78	100	no	Effect might be not that large, but under specific circumstances it could be, due to runoff changes and changed input of solids and solutes still on average I assume a relatively weak influence	30	Only a strong reduction of forest cover may result in a nonlinear tipping-like behaviour in the linked river ecosystems, and only in specific regions. Note, the 30% refer to a remaining forest cover of 30%	I'd put b) after d)
LSC_Biocean	Exp12	no	0.392857	0.821429	0.75	100	No	Impact of forest cover loss on run-off of particulate matter and nutrients to local waters. Impact would vary considerably, e.g. if considering mangroves in forest cover or not	60	Even if land remains dominated in forest (>50%) there could still be very large non-linear impacts on local ocean fish communities.
LSC_Biocean	Exp16	no	0.72	0.82	0.78	100	no specific region	Loss of forest cover might lead to more sediment and nutrient flowing into coastal systems	0
LSC_Biocean	Exp20	no	0.744444	0.8	0.8	100	no	Honestly, I wouldn't expect a change here without a huge forest cover change	40	Would need to be an enormous change
LSC_Biocean	Exp23	no	0.1	1.3	0.3	100	No	Change in forest cover can alter geochemical flows, release toxins and increase costal water turbidity (through land erosion) and inceased inputs of freshwater	20	>20% tree cover forest change ecosystem characteristics to Shrubland and open grassland/savanna with much higher erosion potential and less water holding capacity	c) a) b) -> ranked to them according to sensitivity of freshwater ecoystems	No
LSC_Biocean	Exp37	no	0.678571	0.792857	0.75	100	No	Some forest nearby coastal will protect coastal ecosystems and fish production	85		acb	No
LSC_Biocean	Exp40	no	0.477778	0.811111	0.7	100	No	Here there are likely to be direct negative impacts of reduced forest cover on the neighbouring coastal ecosystem, particularly in terms of increased nutrient and freshwater fluxes.	50	This is just a best guess	a), b), c) Unless there is significant wind erosion, mechanism b) requires an increase in mechanism a). Mechanism a) may then the additional impacts of localised changes in salinity, water density and temperature, although these are likely to be confined to the river mouth, for example.	I don't think so
LSC_Biocean	Exp41	no	0.228571	0.942857	0.8	100	Australia, Americas, SE Asia	Changed river flow and material coming down as organic nutrient sources could influence local production	80	There needs to be a big enough reduction thaht it is undermining key processes and given savannah-wood dynamics that seems to have to be a decent drop not minor shifts	a,b,c. The ordering is mainly because the water has a role in its won right, but is also the dispersive mechanism for the nutrients. It can also be mediated through other intermediary steps (such as oxygen cycles of habitat health). Having said that my old mantra kicks in and c could be important in some systems where it is a particularly strong toxin or tanin, or where the eroded material smothe…	Potentially yes depending on what area is fed by the watershed and whether the fish stocks are source stocks for a larger population or have some other disproportionate role
LSC_Biog	Exp10	no	0.533636	0.624545	0.57	100	none	Lower forest cover causes increased runoff, but as forest cover remains quite high, runoff won't increase hugely - should be proportional	50	Once half of forest cover is removed, a large amount of land is exposed increasing runoff potential	c a b I think it is hard to rank these, but c is the most direct and clear pathway based on my knowledge of this effect. Though my confidence in this ranking is low.	I think most of these effects would be local, with the possibility of e.g. eutrophication following from increase N runoff into nearby water bodies.
LSC_Biog	Exp14	no	0.466667	0.733333	0.6	100	No, but I would expect the impact to be higher in tropical regions where precipitation is higher	Nitrate leaching losses from forest systems are usually lower than from other types of land use. Therefore, a decline in forest cover will lead to an increase in N leaching	50	A substantial amount of forest would need to be lost to see a tipping point in N runoff	a>c>b	I don't think so
LSC_Biog	Exp16	no	0.48	0.58	0.52	100	no specific region	Loss of forest cover might lead to more erosion and more leaching	0
LSC_Biog	Exp20	no	0.4	0.6	0.5	100	no	Hugely dependent on time scale and also what replaces the forest. If it's changed to fertilized land, I would expect a bigger change. If not, and we're in asia or somewhere with a lot of atmospheric deposition, I'd expect it to go the other way	30	Would need a really big change
LSC_Biog	Exp21	no	0.416667	1	0.75	100	None	Forest cover can help to absorb nutrient before they get into surface water.	60		C A B
LSC_Biog	Exp23	no	0.4	1	0.6	100	no	Change in forest cover may increase leaching of N due to less uptake/retention of N	20	As N constraining factor for all vegetation a drastic reduction might be needed for N leaching to happen	c) a) + b) -> identical but b) more detailed	no
LSC_Biog	Exp24	no	0.47	0.57	0.53	100	Hubbard brook experiment, referenced paper from Amazon, etc.	Mechanism is increased soil erosion and runoff causing more nutrient loss. There will be temporal dynamic – large increase for a 2-3 year period after clearing but then a return to base levels (https://www.mdpi.com/1999-4907/8/1/5). Another study found modest but detectable increase in Brazilian Amazon (https://link.springer.com/article/10.1023/B:BIOG.0000025744.78309.2e)	0		c, a, b. I think soil erosion and increase in runoff are the main mechanisms.
LSC_Biog	Exp25	no	0	6.33333	3	100	Humid Mediterranean cereal basin	Mechanism is increased soil erosion and runoff causing more nutrient loss. There will be temporal dynamic – large increase for a 2-3 year period after clearing but then a return to base levels (https://www.mdpi.com/1999-4907/8/1/5). Another study found modest but detectable increase in Brazilian Amazon (https://link.springer.com/article/10.1023/B:BIOG.0000025744.78309.2e)	0	According to this regression, there are no tipping points	a, c, b To rank these mechanisms, we need to know where we are. For example, in semiarid regions, the nutrient loss by erosion is enormous and c) could be the most important mechanism. In temperate areas a) mechanism could prevail	Erosion affects nutrient imbalances such as N:P:Si and could affect algal blooms in coastal waters very far from the studied region
LSC_Biog	Exp34	no	0.4	4.8	1.2	100	Not really	Suspect that a change from 90% to 80% doesn't go far enough to get the really long tail, but that there is still quite a long tail of potentially large impact of loss of forest. A lot of the variabilty in my answer is because the increase in N leaching will depend in part on the type of forest and which parts of the forest are cut ... 10% throughout a large patch (by selective logging) is quite d…	30	Its a guess, really. Also, a lot would depend on how the loss happens (fire v cutting) and in what spatial pattern.
LSC_Biog	Exp37	no	0.51	0.65	0.55	100	No	forest plays an important role on regulating runoff in nearby areas	85		bac	No
LSC_Biog	Exp39	no	0.2	4.2	0.8	100	No	Increased leaching after land use conversion, magnitude depends on land use intensity and type	0
LSC_Biog	Exp47	no	0.825	1.7	1.2	100	I was thinking of both boreal and tropical forests.	Reduction in forest cover triggers rapid decomposition of soil and above-ground organic matter which contains nitrogen, and consequent leaching to watercourses. If converted to agriculture, soil cultivation not to talk about fertilization accelerates the process. After a conversion period of even decade(s) with abundant leaching, a new steady state with a bit less leaching will be reached. Also s…	75	It is decisive, what land use follows - in case of agriculture already a relatively small change would be sufficient to trigger a nonlinear change. Context-dependent, therefore difficult to assess	Tropical forest: a) > b), c) Boreal forest: b) > a) > c)	Increase in N concentration and availability in the surrounding watershed could trigger land eutrophication and therefore biodiversity loss and soil carbon decomposition
LSC_Blue	Exp11	High	50	91.6667	75	100	I was thinking of the US Upper Midwest (corn belt), apart from the other specific regional examples I mentioned.	My answer to this question depends strongly on what replaces the forests; for the purposes of this answer, I assumed agriculture. Deforestation would lead to more direct runoff and less groundwater recharge. As a result, I would expect high season flows to increase in response to deforestation (assuming they are driven by precipitation) as part of a switch to a flashier flow regime. I could imagi…	65	I would guess this interactions would be nonlinear across the entire range of forest cover conditions, but the peak of the second derivative would be around ~65% forest cover.	d,c,a,e,b - mechanisms a, c, and d are all interlinked in that they are changes in the partitioning of precipitation at the land surface. so a change in one of these would need to be balanced by a corresponding change in another.	Because of the impacts on discharge, there could be cascading effects could be felt downstream of the region of interest. In particular, erosion and sedimentation could affect water quality and aquatic ecosystems.
LSC_Blue	Exp11	Low	78.75	103.75	85	100		My answer to this question depends strongly on what replaces the forests; for the purposes of this answer, I assumed agriculture. Deforestation would lead to more direct runoff and less groundwater recharge. As a result, I would expect low seasons to decrease in response to deforestation. The magnitude of the decrease would depend on whether the agriculture is rainfed or irrigated, with greater d…	100	I think this relationship would be nonlinear across the entire range of X values, with relatively minor effects at small levels of deforestation and an exponential increase at higher levels of deforestation before plateauing at some low-flow value which would depend on the annual and seasonal distribution of precipitation.
LSC_Blue	Exp13	High	59.8485	85.101	75	100	no	At this local scale (100 km2) there are many studies that show that the effect of reduced forest cover is an increased discharge. However, it is somewhat misleading because we should also consider the larger effect of moisture recycling and moisture transport on scales of hundreds to thousand kilometers distance.	0	Difficult to say as it depends more on the system that is put in place of the forest rather than the value of forest change.	c, d, a, b, e b, at the scale we are looking at there is absolutely no scientific proof that more forest cover leads to more precipitation, rather microclimate feedbacks may outweigh the moisture recycling ones, that could decrease precipitation with more forest cover. e, this mechanism does not make sense to me. Normally, I would consider runoff/river discharge to influence erosion, not the othe…
LSC_Blue	Exp13	Low	70	126.25	95	100		There are two processes counteracting at the local scale: trees lowering the groundwater table, and trees promoting infiltration, thus bringing the groundwater table up. The combined response is hard to predict	100	non-linear by definition depending on many climatological and landscape factors
LSC_Blue	Exp14	High	60	80	70	100	Tropical regions most affected	A decline in forest cover will result in less rainfall being intercepted, and so an increase in surface flow	0	Major forest clearance will be needed for discharge to be severely altered; I'm not sure if a tipping point is applicable here, as very 'event' driven	d>a>c>B>e	I don't think so
LSC_Blue	Exp14	Low	85	95	95	100		During low flow, I would except less of an influence of changing tree cover	0	I"m not sure there would be a tipping point
LSC_Blue	Exp16	High	66.6667	83.3333	75	100	not specific	Loss of forest will increase drainage and runoff	0
LSC_Blue	Exp16	Low	91.6667	108.333	100	100		Loss of forest will increase drainage and runoff	0
LSC_Blue	Exp15	High	55.7143	98.5714	70	100	Sub - Saharan Africa, Amazon	Loss of forest leads to reduction in moisture recycling, which will reduce the rainfall in the nearby region. There could be some counter acting force here in the form of reduction in infiltration rate and evaporation so the fast runoff may increase. But overall the reduction in rainfall will dominate reducing the runoff	0		b); a); c); d); e)
LSC_Blue	Exp15	Low	63.3333	105	80	100		Decrease in forest cover reduce the moisture recycling, reduce infiltration, reduce the evapotranspiration	0
LSC_Blue	Exp20	High	65	68	66	100	no	I'd expect an increase in flow, but this is such a small change that I doubt it would be detectable	45	Need a big change
LSC_Blue	Exp20	Low	95	97	95	100		Would expect a very small decrease	50	Need a big change
LSC_Blue	Exp21	High	40	66.6667	60	100	No specific region in mind	Increased agricultural expansion would likely demand more water, leaving less available for environmental flows. Declining forest cover could also lead to more erosion and sedimentation that could decrease flows.	0	I don't have a good estimate for this	E C D B A
LSC_Blue	Exp21	Low	69.4286	98	88	100		Suspect impacts would be more realized in low flow	0	I don't have a good estimate for this
LSC_Blue	Exp23	High	50	130	70	100	no	decrease in forest cover actually increase maximum river discharge and risk of flooding events because it removes the buffering capacity for taking up rainwater thus increasing flows	80	below 80% tree cover forrest changes to open forrest with differetn characteristics	c) b) d) a) e)	no
LSC_Blue	Exp23	Low	40	120	80	100		decrease in forest cover will decrease river discharge because it the removes the buffering capacity for taking up rainwater and by this provision of constant minimum flow rate from land to water decreasing flows	80	<80 tree cover forest change characteristics
LSC_Blue	Exp24	High	60	80	70	100	Tropical rainforests, for the tipping point mechanism. Otherwise more global.	Decrease in forest cover will decrease evapotranspiration and increase river discharge. This is assuming that the decrease in forest cover is sufficiently small not to change precipitation.	30	Below a certain threshold, deforestation would change rainfall patterns, especially in the tropics. Not sure about the threshold though.	c, a, d, b
LSC_Blue	Exp24	Low	94	100	98	100		Decrease in forest cover will decrease evapotranspiration and increase river discharge. This is assuming that the decrease in forest cover is sufficiently small not to change precipitation.	30	Below a certain threshold, deforestation would change rainfall patterns, especially in the tropics. Not sure about the threshold though.
LSC_Blue	Exp30	High	63.3636	72.4545	67	100	none	If new land cover is well-vegetated, I do not expect any impact, and the maximum impact would be in case of urbanization and a steep terrain, but the change affects just 10% of the area, so ímpact of increased surface runoff as compared to Infiltration is expected to be rather small.	0	As streamflow is the sum of runoff generation per area over all areas, I do not expect a tipping point.
LSC_Blue	Exp30	Low	89.7273	109.727	97	100		With less forest, evapotranspiration decreases and total runoff (surface runoff plus groundwater recharge) increases. I guess in most basins groundwater recharge increases as a consequence, leading to increased flows during the low flow season. In some drainage basins, however, groundwater recharge may be decreased if due to lack of vegetated surface, surface runoff is increased.	0	As streamflow is the sum of runoff generation per area over all areas, I do not expect a tipping point.
LSC_Blue	Exp33	High	48.5714	91.4286	70	100	no	As a starting point, I took the negative of my estimated effect of land system change on green water, because the water that is not evaporated as a result of forest loss will tend to become river discharge. However, some of the evaporation that is lost would have ended up as local river discharge as well, if it would have resulted in precipitation within the same river basin. For this reason, the…	60	The nonlinearity threshold would be the level of forest cover at which the connectivity of forest cover is lost and thereby surface runoff greatly increased. This point is the percolation threshold, which depends on the spatial configuration of forest loss, but a reasonable and somewhat conservative estimate is 60% forest cover.	c - a - d - b - e
LSC_Blue	Exp33	Low	80.7143	109.286	95	100		As a starting point, I took the negative of my estimated effect of land system change on green water, because the water that is not evaporated as a result of forest loss will tend to become river discharge. However, some of the evaporation that is lost would have ended up as local river discharge as well, if it would have resulted in precipitation within the same river basin. For this reason, the…	60	The nonlinearity threshold would be the level of forest cover at which the connectivity of forest cover is lost and thereby surface runoff greatly increased. This point is the percolation threshold, which depends on the spatial configuration of forest loss, but a reasonable and somewhat conservative estimate is 60% forest cover.
LSC_Blue	Exp35	High	60	135	110	100	central europe	deforestation is often accompanied by an increase in surface runoff, thus adding to the BW discharge	0		1. d) -> 2. c) -> 3. a) -> 4. b) -> 5. e)	Presumably the effects are mainly felt within the respective watershed.
LSC_Blue	Exp35	Low	91.25	135	110	100		deforestation is often accompanied by an increase in surface runoff, thus adding to the BW discharge	0
LSC_Blue	Exp36	High	36.5385	98.0769	75	100	Tropical catchments	Numerous field and model studies have shown an increase in peak flows after deforestation due to reduced ET and an overall increase in high flow season. These values are very context specific, depend on replacement vegetation cover and time since deforestation	50	Below this threshold, other vegetation becomes more dominant and thus control the hydrological response. ET response could go up or down or become increasingly seasonal (crops)	d, c, a, e, b The mechanism of erosion is very context specific and depends on topography and intensity of precipitation. The mechamism of precipitation will only be relevant for vast forested areas. A missing mechanism is the role of forest cover in cloud forests capturing occult precipitation, mainly in tropical areas in so called tropical montane cloud forests (TMCF). These can capture a signi…	The atmospheric circulation mechanisms of changes in ET and precipitation feedback would impact other areas but these impacts are very small or negligible for small forested areas.
LSC_Blue	Exp36	Low	73.3333	123.333	90	100		Low flows can go up or down after deforestation. This is really dependent on soil properties, tree species and infiltration and ET ratio changes. They are more likely to go down though	50	Below this threshold, other vegetation becomes more dominant and thus control the hydrological response. ET response could go up or down or become increasingly seasonal (crops)
LSC_Blue	Exp37	High	46.6667	63.3333	55	100	No	Forest is important to regulate flow of freshwater.	85			badce
LSC_Blue	Exp37	Low	75	95	85	100		Forest plays an important role in freshwater ecosystems	85
LSC_Blue	Exp39	High	60	90	70	100	No	Increased stream flow Dynamics by deforestation	50	Change to open landscape
LSC_Blue	Exp39	Low	70	100	90	100		Increased stream flow Dynamics by deforestation	50	Change to open landscape
LSC_Blue	Exp42	High	68	73	70.5	100	No	Less interception, less transpiration, less infiltration, more surface runoff which especially contributes to high flows (see also Dennedy-Frank et al. 2019 GEC)	0		a+c (less forest cover, less evapotranspiration), b+d (precipitation and surface runoff are rather results of the previous effects on evapotranspiration and infiltration capacity), e (unclear how erosion affects river discharge, more erosion might rather be caused by more surface runoff)	Downstream in the same catchment
LSC_Blue	Exp42	Low	93	99.6667	95.5	100		Low flows are less affected than high flows because there is a shift towards more surface runoff which feeds the high flows (see also Dennedy-Frank et al. 2019 GEC)	0
LSC_Blue	Exp45	High	64	72	68	100	no	River flow is probably always somewhat responsive, especially high flows. I'm not so confident about the particular position (forest cover from 90 to 80% and a flow of 65% of preindustrial). New comment: high flow should by tendency increase if forest cover decreases (lower evapotranspiration, which increases soil moisture, as well as lower macro-infiltration that may result in somewhat higher su…	60	a further 20% reduction is probably strong enough to provoke a strong response	I'd definitely add and put first: forest cover --> evapotranspiration --> soil moisture --> river discharge. An interaction well established in literature (forest loss increasing high flows (as less water can infiltrate and taken up by deep roots)	downstream effects of these interactions
LSC_Blue	Exp45	Low	91	99	95	100		Requires somewhat stronger change than for high flow. New comment: the change could go either direction (increased low flow due to lower transpiration but at the same time lower infiltration and thus higher surface runoff	40	Requires somewhat stronger change than for high flow
LSC_Blue	Exp49	High	53.5714	96.4286	75	100	none	High season flow is generated by surface runoff in response to precipitation, and therefore sensitive to basin drainage characteristics. A decrease in forest cover impacts terrestrial water storage and fluxes through changes in vegetation cover (interception), root zone dynamics (soil water holding capacity), and vegetation water use (evapotranspiration). Such impacts shift the water balance, mak…	0
LSC_Blue	Exp49	Low	70.7143	92.1429	85	100		Low season flow is generated by subsurface runoff (baseflow or lowflow) and is therefore sensitive to groundwater recharge and storage. A decrease in forest cover impacts terrestrial water storage and fluxes through changes in vegetation cover (interception), root zone dynamics (soil water holding capacity), and vegetation water use (evapotranspiration). Such impacts shift the water balance, maki…	0
LSC_Blue	Exp31	High	65	85	75	100	Amazon or Congo	As less forest exists, more partitioning of precipitation as runoff. I expect to be more noticeable done for low flows, as no vegetation will be able to retain water in the roots.	70	Just a wild guess, but again, where there is strong moisture recycling from the region where the forest is located, forest will decrease, ET will decrease, P will decrease, reducing forest voer by increase in fires or drought conditions or conversion to savannah. Experts on this are Arie Staal or Lan Wang Erlandsson.	d c e b a	No idea
LSC_Blue	Exp31	Low	0	0	0	100	Amazon or Congo	For low flow, I expect the same order, difficult to tell really by how much there would be a difference
LSC_Green	Exp11	no	77.5	90.8333	87.5	100	I was thinking of the Amazon. I don't have any personal or research familiarity with the Amazon, but when I think deforestation, that is what comes to mind.	Given that forest cover is currently 90% of baseline and soil moisture levels are 95% (as given in the prompt), this indicates that the decrease in soil moisture is about half of the decrease in forest cover. This also intuitively makes sense to me, because when deforestation occurs, the root zone does not completely dry out (i.e., soil moisture never goes to zero in reality), but rather to a low…	70	70% is about where a nonlinear tipping point was identified by Zemp et al. (2017) for the Amazon.	c,a,d,b,e - I think one other mechanism is changes in interception of precipitation. Even if evapotranspiration is the same, if less of the ET is from intercepted water after a forest is removed, it would mean that soil moisture would change.	Yes, all of these could via changes in atmospheric moisture recycling which would impact downwind vegetation, soil moisture, and rivers. This would be at a scale no larger than a continent but probably on the order of 100s of kms.
LSC_Green	Exp13	no	84.9192	100.071	93	100	no	I reduction in forest cover from 90 to 80% is not likely to have a big effect on local soil moisture. This does, however, depend on how exactly the forest cover is reduced (at random locations, or a specific plot within the 100 km2). The reduced evaporation will probably not lead to reduced precipitation as the area is so small. Infiltration will be worse in the deforested area, but this is count…	50	Hard to say as this really depend on how you deforest and on whether the area is water limited or energy limited from an evaporative demand point of view.	a, d, e, c, b I am always confused about double minus relations. If mechanism e means, more forest cover, less erosion, more soil moisture than I agree, otherwise the mechanism is wrong. b, at the scale we are looking at there is absolutely no scientific proof that more forest cover leads to more precipitation, rather microclimate feedbacks may outweigh the moisture recycling ones, that could dec…	Yes, b could cascade to scales way beyond the study region. There is some proof that at very large scales forest cover increases precipitation, but as the hypothetical region is so small you wouldn't notice the effect.
LSC_Green	Exp14	no	65	85	75	100	Amazon and other tropical rainforests	A decline in forest cover will lead in some areas, eg the tropics, less evapotranspiration, and so a decline in precip over a broad regional scale. But loss of forest cover would also lead to less water being held in the soil too	70	In the tropics, such as the Amazon, recent estimates of a tipping point are about 20-25% decline in forest cover	a,b,c,d>e	Yes, if regional precipitation is altered through large-scale ET processes
LSC_Green	Exp16	no	70	100	90	100	no specific region	Very uncertain. Loss of forest could impact precipitation. Could also lead to drying out of soils	0
LSC_Green	Exp15	no	75.7143	90	90	100	Sub-Saharan Africa	Large scale deforestation in Sub-Saharan Africa has led to the expansion of desertification, frequent drought, and loss of soil moisture. Deforestation lead of reduction in moisture recycling	0		a); b); d); c); e)
LSC_Green	Exp20	no	95	95	95	100	no	I would not expect to see a signal on nearby land at this level of change	45	Need a huge change to see this
LSC_Green	Exp21	no	73.3333	98.3333	90	100	None	More likely issues of erosion. Less land cover, may have more losses of water from evapotranspiration	0	I don't have a good estimate for this	E C D B A
LSC_Green	Exp23	no	40	120	80	100	no	Decrease of forest cover has strong effect on soil moisture as it increases locally exposure to sun and wind and thus increase transpiration and transport of water to atmosphere	80	less 80 forest cover change forest characteristics	c) a) b) d) e) -> all elements essential	yes, forest cover regulate global moisture recycling cycle and influcence precipitation pattern via telconnected atmospheric moisture flow
LSC_Green	Exp24	no	92	102	98	100	Tropical rainforests, for the tipping point mechanism. Otherwise more global.	Decrease in forest cover will decrease evapotranspiration and increase soil moisture. Partly counteracted by loss of "sponge effect" of tree cover. But Bruijnzeel (2014) seems to conclude increased soil moisture overall.	30	Below a certain threshold, deforestation would change rainfall patterns, especially in the tropics. Not sure about the threshold though.	c, a, d, b
LSC_Green	Exp33	no	83.75	102.5	90	100	none	If forest cover would be responsible for all global evapotranspiration, a decrease from 90% to 80% can be assumed to reduce nearby soil moisture by 10 percentage points. However, the share of precipitation that has been generated by forests (either by transpiration or interception evaporation) varies between 0-100% globally, both spatially and temporally. This presents great uncertainty, although…	50	The nonlinearity point might be when a loss in forest cover, through reduced evapotransiration, prevents precipitation events from occurring. This will be highly variable and is highly uncertain 50% is my first guess.	c - a - d - b - e	The effect on precipitation occurs at large spatial scales (100s of km or more) and may occur through multiple re-evaporation cycles.
LSC_Green	Exp35	no	67.8571	96.4286	75	100	no specific region	Deep roots trees of forests can take out water from deeper soil layers, thus have be able to access more soil moisture but also add more green water flux to the atmosphere which, in turn, would benefit soil moisture recycling and thus GW. The shadows casted by trees, the absence of fallowness and presence of litter protect soil moister from evaporation. Deforestation will thus have a strong detri…	0		1. a) -> 2. b) -> 3. d) -> 4. c) -> 5. e)	b), c) and d) point towards moisture recycling. A dampening of the moisture recycling mechanism will have detrimental effects on soil moisture way beyond the specific area.
LSC_Green	Exp36	no	91.6667	116.667	100	100	None	Decreased forest cover will lead to increased runoff and overall higher soil moisture, although depends on when growing season is in relation to seasonality of runoff	50	Very low forest values will lead to flashy runoff and low recharge resulting in non linear changes in soil moisture	d, a, c, e, b The land erosion is very context specific and may play a large role in steep topography and highly intense rainfall system.	If soil moisture drops significantly this can lead to wildfires that may have cascading impacts beyond the region.
LSC_Green	Exp37	no	77.8571	92.1429	85	100	No	Forest plays an important role on regulating soil moisture on nearby land	85		acdeb	No
LSC_Green	Exp38	no	55	125	105	100	Tropics	Q1: 90% -> 80 % forest cover, max. 8-10 % decrease in total evaporation depending on resulting land-use (assuming desert/impermeable surfaces), if neighboring soil moisture relies on forest supplied moisture for 100 % of its growing season rainfall, the soil moisture decrease could be max 10 %. If the forest cover loss at the same time increases evaporative demand on surrounding land, more than 1…	30	Lawrence et al. 2014, Fig B1
LSC_Green	Exp39	no	60	140	100	100	No	ET is larger in forests resulting in lower soil moisture
LSC_Green	Exp42	no	90.8333	99.1667	95	100	No	Water holding capacity decreases but also evapotranspiration decreases. The two changes might compensate for each other.	0		a+c (less forest cover, less evapotranspiration), b+d (precipitation and surface runoff are rather results of the previous effects on evapotranspiration and infiltration capacity), e (unclear how erosion affects soil moisture)	Rather not
LSC_Green	Exp45	no	78.75	91.25	85	100	no	strong direct links, mainly via transpiration change and involvment of deep roots, which cannot be fully compensated by evaporation or transpiration of replacing vegetation	60	I assume at some point soil moisture may respond nonlinearly due to larger ecosystem shifts (e.g. further forest decline due to fragmentation)	agree; these are also processes related to my addition in the previous box (land system change -> blue water)	if the green water flow change would affect climate with possible effects also in larger, remote regions...
LSC_Green	Exp49	no	69.2857	119.286	105	100	none	Growing season soil moisture is impacted by changes to the amount of water percolating into the subsurface and the capacity of the soil to hold water. A decrease in forest cover impacts the water balance by reducing interception and vegetation water use (evapotranspiration), increasing the water available to percolate, resulting in increased water available to runnoff as well as percolate to beco…	0
Biog_Biland	Exp14	no	90	100	96	100	Regions which are N-limited are more susceptible to increases in run off	An increase in N will lead to an overall increase in terrestrial productivity, hence the increase in population numbers selected. Of course, this will be greater in N-limited regions	2.5	1-2.5 mg N/L is the current range to prevent eutrophication from a number of studies, so for a tipping point, the value would need to be at the upper range of this. *But*, for increasing vertebrate populations on land, a tipping point of N from runoff probably does not exist
Biog_Biland	Exp16	no	95	95	95	100	no specific region	no link	0
Biog_Biland	Exp23	no	5	105	75	100	No	Nitrate leaching into soil can boost general plant growth and high amounts can be toxic for nutrient poor adapted species. N fertilization often also decreased soil carbon storage capacity due to increased above ground biomass production and higher belowground microbial breakdown	15	Already toxic effects have been reported at >11 N mg/l	c) b) a)	Yes Euthropication can lead to freshwater ecoysysem degradation and cascade to createing of unoxid zones in ocean. this will have massive impact on coastal /planktonic biodiversity and influences CO2 uptake capacity of oceans and by this mitigation of global warming
Biog_Biland	Exp25	no	95	95	95	100	European rivers	According to Camargo et al. 2006 (Env. Int) “It is concluded that levels of total nitrogen lower than 0.5–1.0 mg TN/L could prevent aquatic ecosystems”. This is also the threshold used by de Vries et al. to establish the PB limits. 0.8 mg N/L are, therefore, below the upper limit. Although it is higher than the common concentration in natural rivers (see Meybeck et al. 1982 Am. J. Sci), I do not …	25	It is difficult to estimate the threshold because eutrophication depend on other factors such as Si:P imbalances	Terrestrial biodiversity is much more affected by atmospheric N deposition than of N concentration in waters. I would not expect severe impacts by any of those mechanisms.
Biog_Biland	Exp29	no	45	105	95	100	European agricultural landscapes, US coastal regions	Highly uncertain since no parameterizations of the BII in relation to nitrogen bleaching exist. The effect however is likely accompanied by matching changes in use intensity of anthropologically modified land (cropland).	10	Many previous studies have indicated considerably higher estimates in agricultural and urban areas. E.g. https://www.sciencedirect.com/science/article/pii/S004896971300466X https://journals.plos.org/plosone/article?id=10.1371/journal.pone.0229715
Biog_Biland	Exp37	no	50	96	90	100	No	leached nitrogen concentration in runoff will cause acidification and eutrophication, and affect the growing environmental of nearby livings	0.55		acb	No
Biog_Bifresh	Exp14	no	0.666667	0.933333	0.8	100	Europe	A small increase in N will result in an increase in freshwater productivity and hence possibly a small increase in fish biomass. The increase is still below that which could lead to eutrophication and subsequent decline in fish populations	5	1-2.5 mg N/L is the current range to prevent eutrophication from a number of studies, so for a tipping point, the value would need to be above this range. In many European waters, N ranges from 2-10 mg /L, so something at the higher end of this range perhaps or higher. Fish in Britain are still not back to 'normal' for example, where highest levels seem to be	b) > a)	Probably not, as the impacts will be confined to the river and its network, in turn linked to connectivitty	a) Above 2.5 or 3 mg /L. b) I'm not sure
Biog_Bifresh	Exp16	no	0.45	0.95	0.75	100	no specific region	Additional nutrients could benefit or harm fish population	0
Biog_Bifresh	Exp21	no	0.3	0.9	0.7	100	None specific	Increased runoff and lead to algae blooms the kill of fish	0	I don't have a good estimate for this	B A
Biog_Bifresh	Exp23	no	0.4	1.2	0.8	100	mainly lakes and ponds. Characteristics in river are differently nutrient river run off can create anoxic zones in coastal areas and separated ocean regions e.g. baltic	High Nitrate leaching may turn water into turbid state or even anoxid state. Little N leaching leads to slight fertilization of the system boosting plant growth and has a long residence time until fixated	8	>11 mg/ l have been recorded amount for induce tipping into turbid state for shallow lakes	b) a)	Yes, euthropication can create anoxic zones in oceans that may changes CO2 uptake in Ocean and mitigation of climate effect
Biog_Bifresh	Exp25	no	0.8	0.8	0.8	100	European rivers	According to Camargo et al. 2006 (Env. Int) “It is concluded that levels of total nitrogen lower than 0.5–1.0 mg TN/L could prevent aquatic ecosystems”. This is also the threshold used by de Vries et al. to establish the PB limits. 0.8 mg N/L are, therefore, below the upper limit. Although it is higher than the common concentration in natural rivers (see Meybeck et al. 1982 Am. J. Sci), I do not …	25	It is difficult to estimate the threshold because eutrophication depend on other factors such as Si:P imbalances	a) in the first stages of eutrophication b) in the second or more advances stages of eutrophication
Biog_Bifresh	Exp37	no	0.133333	0.766667	0.6	100	No	The nitrogen in the runoff will cause acidification and eutrophication and then reduce fish biomass	0.6		ab	No
Biog_Biocean	Exp12	no	0.4	0.8	0.6	100	No	Considerable uncertainty due to the regional nature of this planetary boundary and its impact on different marine ecosystems.	0.8
Biog_Biocean	Exp16	no	0.65	0.89	0.75	100	not specific	Additional nutrients might benefit, but more likely harm fish population	0
Biog_Biocean	Exp21	no	0.457143	0.885714	0.6	100	Gulf of Mexico and Great Barrier Reef	There is substantial biodiversity in coastal regions and reefs near land. Agricultural runoff and impacts these areas with devasting impacts on fish kill offs and damage to critical reef ecosystems	0	I don't have a good estimate for this	B A
Biog_Biocean	Exp23	no	0.4	1.2	0.8	100	No	High inputs of N may induce algal blooms or anoxic regions in coastal waters. Moderate to low inputs are unlikely to have strong effects	20	Considered high concentration	b) -> toxic effect may change whole ecosystem structure a) -> potentially beneficial for system	no
Biog_Biocean	Exp25	no	0.8	0.8	0.8	100	European rivers	According to Camargo et al. 2006 (Env. Int) “It is concluded that levels of total nitrogen lower than 0.5–1.0 mg TN/L could prevent aquatic ecosystems”. This is also the threshold used by de Vries et al. to establish the PB limits. 0.8 mg N/L are, therefore, below the upper limit. Although it is higher than the common concentration in natural rivers (see Meybeck et al. 1982 Am. J. Sci), I do not …	25	It depends on Si and P imbalances	a) in the first stages of eutrophication b) in the second or more advances stages of eutrophication
Biog_Biocean	Exp37	no	0.366667	0.783333	0.7	100	No	increase in leached nitrogen concentration in runoff will cause ocean acidification and eutrophication, and then reduce fish biomass in nearby coastal ecosystems.	0.6		No		ab
Biog_Biocean	Exp41	no	0	1.75714	0.9	100	Australia, Amercias	Additional nutrient flow is very context specific and non-linear in terms of the effects it has on the system. A small/moderate addition (especially to a nutrient poor system) can see positive effects on local marine production. However major additions or additions pushing a system into a highly eutrophied state can lead to oxygen deficit zones which has a strongly detrimental effect on local fis…	0.7	Very context specific, but usually short of doubling	a if on the growing slope of the nutrient-productivity relationship; b if sitting on/past peak and on the "harmful" side of the nutrient-productivity relationship	As with all my other answers, it depends on the system structure and context. If the river system is large or has a large footprint plume wise or trophic connection wise (e.g. via species using parts of it as habitat or spawning or nursery grounds) then it could have a larger spatial effect	It likely is nonlinear however as to potential response that will depend on background levels and system structure. For some systems that level coming off a low baseline could see a more productive system result, especially if the producers were non-toxic and didn't overwhelm oxygen cycles. However, in systems close to the edge of eutrophication or where bacterial background dominates and oxygen …
Biog_LSC	Exp14	no	88.3333	97.6667	95	100	boreal and temperate ecosystems where soils are sensitive to acidity, eg where base cations are low	An increase in N will result in an increase in terrestrial productivity, and in N limited systems, eg taiga, ample evidence of increased tree growth. But, The changes in concentration proposed here are very low. Already modelled concentrations of N in leaching water from agricultural soils in northwestern EU in 2008 range from 2-10 mgN/L	0	To cause a terrestrial tipping point, probably a relatively high N values is needed. I'm not sure sure what type of tipping point would be felt here - unless we think about N exceeding its critical load and starts to cause forest decline.	b>a	I don't think so, as increase in soil acidification and therefore impact on forest cover would be dependent on the catchment, e.g. in regions where base cations are low. So I don't think a cascading effect is possible outside of a particular catchment region	Study by Nordin et al. 2005 (Ambio) suggests a critical load limit of 6 kg N ha-1 yr-1, but I'm not sure how that would translate into mg N/L, but possibly 12 mg N/L?
Biog_LSC	Exp16	no	89.7778	95.3333	92	100	no specific region	Possible fertilization effect depending on relationship between forest and agriculture. Probably no effect if forests are topographically above the agriculture. May be a fertilization effect on forests along river course or downstream lowlands	0
Biog_LSC	Exp23	no	47	103	93	100	no	Nitrogen leaching may affects forest biomass growth	10	This is value recorded to trigger soil biodivesity changes	a) b) -> not sure how N can trigger soil accidification -> missing: N euthropication which may have strongest effect	yes, euthropication may change forest ecoystem with effects on climate, biodiversity and regional/global moisture recycling
Biog_LSC	Exp24	no	89	99	91	100	No	There will be a positive nitrogen fertilization effect. But I really have no idea how to relate the numerical increase (+0.3 mg N/L) to increased photosynthesis and subsequently to forest cover. It's possible that forests will become more productive without changing cover at all. So I am conservatively estimating little change.	0		a,b
Biog_LSC	Exp25	no	90	90	90	100	Anyone	I cannot see any effec	0		In my opinion, both could be weak mechanisms
Biog_LSC	Exp34	no	90	90	90	100	No	No anticipated impact.	0
Biog_LSC	Exp37	no	60	88.3333	85	100	No	nitrogen concentration in runoff will cause the nearby soil acidification, and then affect forest growth	0.75		ab	No
Biog_Blue	Exp11	High	63.9474	66.0526	65	100	No, not really. Just thinking about general land use-water interactions.	I don't believe there would be an interaction here. Both leached nitrogen and discharge could change in response to a common driver (i.e., expansion of agricultural land use), but the change in nitrogen leaching itself would not have any effect on discharge.	0	I do not believe there is an interaction, so no tipping point listed.	This mechanism seems like it would be pretty local and impacts would not cause significant cascading effects on discharge elsewhere. However, this would definitely lead to cascading impacts on aquatic ecosystems in the affected river and downstream.
Biog_Blue	Exp11	Low	93.9474	96.0526	95	100		I don't believe there would be an interaction here. Both leached nitrogen and discharge could change in response to a common driver (i.e., expansion of agricultural land use), but the change in nitrogen leaching itself would not have any effect on discharge.	0	I do not believe there is an interaction
Biog_Blue	Exp14	High	57	67	63	100	N-limited systems	A modest increase in N will result in an increase in aquatic productivity, which could results in increase in macrophyte growth and perhaps a small decline in flow discharge	5	I'm not sure an increase in N could cause a tipping point in flow. But if aquatic systems did become full of algal blooms, perhaps this could slow flow considerably	No
Biog_Blue	Exp14	Low	83	99	91	100		A modest increase in N will result in an increase in aquatic productivity, which could result in an increase in macrophyte growth and during low flow, increased macrophyte growth should results in a small decline in flow discharge	5	I'm not sure an increase in N could cause a tipping point in flow. But if aquatic systems did become full of algal blooms, perhaps this could slow flow considerably
Biog_Blue	Exp16	High	59.4444	65	65	100	not specific	potential for minor local link through macrophyte growth	0
Biog_Blue	Exp16	Low	92.7778	95	95	100		small potential link through enhanced macrophyte growth	0
Biog_Blue	Exp23	High	65	65	65	100	no	No effect expected	0
Biog_Blue	Exp23	Low	95	95	95	100		No effect expected	0	No thershold expected
Biog_Blue	Exp24	High	65	65	65	100	no	Cannot think of a mechanism	0	No thershold expected
Biog_Blue	Exp24	Low	95	95	95	100		Cannot think of a mechanism	0
Biog_Blue	Exp34	High	65	65	65	100	no	I don't think there is an impact on increased N runoff on freshwater discharge	0
Biog_Blue	Exp34	Low	95	95	95	100		I don't think there is an impact on increased N runoff on freshwater discharge	0
Biog_Blue	Exp37	High	35	63.3333	60	100	No	increase in leached nitrogen concentration in runoff will cause eutrophication and reduce high flow season discharge in nearby freshwater ecosystems	0.75		a	No
Biog_Blue	Exp37	Low	30	96	90	100		increase in leached nitrogen concentration in runoff will cause eutrophication and reduce low flow season discharge in nearby freshwater ecosystems	0.75
Biog_Blue	Exp49	High	65	65	65	100	none	I can't identify a process based impact from changes in leached nitrogen concentration (water quality) on flow in the high or low season (water quantity).	0
Biog_Blue	Exp49	Low	95	95	95	100		I can't identify a process based impact from changes in leached nitrogen concentration (water quality) on flow in the high or low season (water quantity).	0
Biog_Green	Exp11	no	93	98	95.5	100	US Midwest agriculture	After the discussion, I am convinced there could be some minor interactions here (before I did not think so), but that the direction and magnitude of change would be extremely uncertain.	0	I do not see a relationship so no tipping point.	b,d,a,c	These are very indirect and uncertain mechanisms, but I think the effects would primarily be local (unless they led to a substantial change in ET and downwind precipitaiton).
Biog_Green	Exp14	no	95	95	95	100	No	At levels of N leaching here, unlikely to be any impact. If anything, N leaching is more likely to be influenced the other way round, with factors that affect soil moisture impacting on amount of N being leached	0	I don't think that increasing N will cause a tipping point in green water		I don't think so, as any impact would be limited to the extent of the catchment soil, so very much a local effect
Biog_Green	Exp16	no	95	95	95	100	not specific	no obvious link	0
Biog_Green	Exp23	no	73	103	97	100	None	No effect expected (or only very slightly by increasing bacterial growth that may increase soil water holding capacity)	0	No trigger expected	a) c) b) d)	yes, changes in soil moisture may trigger vegeation changes that changes global moisture cycle and previpitation patterns/floodings/droughs elsewhere
Biog_Green	Exp25	no	95	95	95	100	anyone	I don´t see any interaction in this direction	0
Biog_Green	Exp37	no	50	90	90	100	No	increase in leached nitrogen concentration in runoff will cause nearby soil acidification, and nearby plants growth, and then reduce soil moisture	0.75		acbd	No
Biog_Green	Exp49	no	95	95	95	100	none	I can't identify a process based impact from changes in leached nitrogen concentration (water quality) on flow in the high or low season (water quantity).	0
Blue_Biland	Exp14	High	80	90	90	100	Large wetland	A decline in flow during high season would result decline in water availability for floodplain ecosystems of large wetlands. This would have implications for specially adapted species that rely on the wet-dry cycles, such as some aquatic plants, microbes etc	0	I don't think non-linear changes would occur	a>e>c>d>b	I don't think so, as restricted to the watershed.
Blue_Biland	Exp14	Low	87	97	93	100		A decline in discharge during already low flow season would probably see not much change in BII organisms already adapted	0	But a cessation in flow could mean that very little water availability which would cause major drought and stress to organisms and I could see a tipping point happening then
Blue_Biland	Exp16	High	89.6667	95.2222	93	100		May be some small impact on animals and birds that feed on aquatic species	0
Blue_Biland	Exp16	Low	88	98	92	100	not specific	May be some small impact on animals and birds that feed on aquatic species	0
Blue_Biland	Exp19	High	60	90	80	100	global so far	might impact connectivity depending on the river type.	95	pristine rivers	a - e - c - d - b
Blue_Biland	Exp19	Low	75	95	85	100		lowering low flow by 5% can be negligeable (depending on the river) and its level of anthropogenisation	95	pristine rivers
Blue_Biland	Exp20	High	89.5556	94.8667	94	100	No	I would expect little impact in this range,This is a small change in flow	35	Totally guessing. A lot lower than it is currently, but not nothing
Blue_Biland	Exp20	Low	87.8462	95.2308	94	100		This is a small change in flow, I expect even less impact on BII	50	Need to to be low enough to see general drying out
Blue_Biland	Exp21	High	65	98.3333	90	100	Great Plains of the U.S.A.	Decreases in surface water reservoirs and irrigation discharge could reduce water flow through rivers, making less water available to the environment	40		C D E A B
Blue_Biland	Exp21	Low	75.7143	97.1429	90	100		I suspect this decline	0
Blue_Biland	Exp23	High	55	105	80	100	Nile river valley, Okawango delta, Aral sea delta, Wolga delta	Ecosystem adapted to highly changing water seasons are strongly adapted to these changes. Especially if they are constantly reoccuring during the annual cycle. High flow seasons often necessary for reproduction (flowering, seed production and sprouting) as well as replenishing of internal water storage resources	60	High adaptation of ecosystem (incl. reproduction) to fixed seasonality	a) b) d) -> equally strong c) e)	No
Blue_Biland	Exp23	Low	65	105	95	100		Low flow seasons are necessary for maintaining minimum environmental flow requirements for land for assuring species survival and ecosystem functioning	90	Transgressing the minimum environmental (land) flow requirements are necessary for ensuring species survival and thus maintain BII
Blue_Biland	Exp26	High	88	94	92	100	No	Changes in high flow season are less of an issue than changes in low flow season	0	Cannot answer without a model and local circumstances
Blue_Biland	Exp26	Low	70	95	90	100		Low flow changes are more important	0	Cannot answer
Blue_Biland	Exp37	High	77	95	93	100	No	decrease in high flow season discharge will affect the growth of nearby livings and then reduce BII	63		bcade	No
Blue_Biland	Exp37	Low	88	94	92	100		decrease in low flow season discharge will affect the growth of nearby livings and then reduce BII	92
Blue_Biland	Exp45	High	92.8235	95.1765	94	100	no	effect only on adjacent land possible, where species depend on flooding - but that would rather affect BII freshwater	0	no tipping expected	agree, but b) is unclear to me (reproduction of what) - I'd assume this is lower order anyway
Blue_Biland	Exp45	Low	93.8235	95	95	100		really little effect expected, only in special conditions	0	no tipping expected
Blue_Bifresh	Exp11	High	0.673333	0.806667	0.78	100	US Great Lakes region	I was thinking that the decrease in fish biomass would be at a lower rate than the decrease in high flows. So, since the discharge dropped by ~8% (5/65), I estimated the biomass would drop by ~2% (0.8*0.98 = 0.78)	100	I would guess this relationship is non-linear across the entire range of pre-industrial flow. Initial changes in discharge would lead to no changes in keystone fish biomass, followed by an accelerating loss in fish biomass as flow continues to decrease, and eventually biomass would hit 0 and then there would be no additional changes in fish biomass as flow continued to reduce. Importantly, I also…	b,a,d,e,c I think one other mechanisms would be changes in discharge leading to new invasive species that outcompete local keystone fish species	Yes, the changes in keystone fish biomass could have impacts on terrestrial and aquatic biodiversity away from the river (via the interactions explored elsewhere on the chart). Also, changes in temperature and oxygen content could propagate downstream and have impacts on downstream or coastal ecosystems.
Blue_Bifresh	Exp11	Low	0.613333	0.813333	0.76	100		Similar logic to the high flows case, but I thought that the biomass would be more sensitive to low flows than high flows, so I doubled the decrease in biomass.	100	Same answer as high flows: I would guess this relationship is non-linear across the entire range of pre-industrial flow. Initial changes in discharge would lead to no changes in keystone fish biomass, followed by an accelerating loss in fish biomass as flow continues to decrease, and eventually biomass would hit 0 and then there would be no additional changes in fish biomass as flow continued to …
Blue_Bifresh	Exp14	High	0.366667	0.633333	0.5	100	No	A decline in high flow will have obvious major implications for freshwater fish. Such that even a small decline will have strong impact	40	Many fish are reliant on flow, so any disruption should have major impact	a, b, c, e > d	I don't think so as limited to watershed
Blue_Bifresh	Exp14	Low	0.6	0.8	0.7	100		During low flow, fish already should be adapted to conditions, so less impact that during high flow	70	But should flow be interrupted in a major way, then potentially greater impact on fish if little water available
Blue_Bifresh	Exp16	High	0.77	0.81	0.79	100	not specific	change in high flow season probably less important than low flow season	0
Blue_Bifresh	Exp16	Low	0.72	0.82	0.78	100		low flow season probably more critical	0
Blue_Bifresh	Exp21	High	0.533333	0.866667	0.7	100	None specifically	Declining discharge could limit ability of freshwater fish to survive, impacting breeding and spawning grounds	0	I don't have a good estimate for this	A B C E D
Blue_Bifresh	Exp21	Low	0.566667	0.9	0.65	100		Low flow would seem to be more dangerous for maintaining minimum flows to avoid fish die offs	0	I don't have a good estimate for this
Blue_Bifresh	Exp23	High	0.5	1.3	0.7	100	No	High flow season is often essential for fish migration and reproduction. Moreover many species adapted to high flows	50	Lowest believed level to maintain groundwater, environmental flow requirements for aquatic and nearby land vegetation with some buffering	a) c) b) e) d)	no
Blue_Bifresh	Exp23	Low	0.4	1.2	0.8	100		Many species adapted to low flow season. With too low flows risk of strong decrease of lake/pond areas decrease food provision for species and increase competitive stress. Risk also of transgressing environmental flow requirements for nearby land vegetation and maintaining ground water levels	80	Lowest believed level to maintain groundwater, environmental flow requirements for aquatic and nearby land vegetation with some buffering
Blue_Bifresh	Exp26	High	0.65	0.83	0.75	100	no	less water means less fish biomass	0
Blue_Bifresh	Exp26	Low	0.65	0.81	0.75	100		less water means less fish biomass	0
Blue_Bifresh	Exp30	High	0.61	0.81	0.79	100	none	Mean change is much lower than interannual variability, and young fish each year need to be able to handle such mean changes. In addition, there are many other more stressors, and there has already been a decrease of 35% of natural streamflow , and as a consequence they biomass has only decreased by 0.2 K. Therefore, I do not expect much impact	80	20% presumptive standard for environmental flow protection by Richter et al. (2012)
Blue_Bifresh	Exp30	Low	0.61	0.81	0.79	100		Mean change is much lower than interannual variability, and young fish each year need to be able to handle such mean changes. In addition, there are many other more stressors, and there has already been a decrease of 35% of natural streamflow , and as a consequence they biomass has only decreased by 0.2 K. Therefore, I do not expect much impact	80	20% presumptive standard for environmental flow protection by Richter et al. (2012)
Blue_Bifresh	Exp37	High	0.65	0.81	0.75	100	No	high flow season discharge drive seasonal changes in the sources of energy supporting fish biomass	62		acbde	No
Blue_Bifresh	Exp37	Low	0.55	0.81	0.75	100		low flow season discharge drive seasonal changes in the sources of energy supporting fish biomass	92
Blue_Bifresh	Exp39	High	0.62	0.82	0.78	100	No	Relatively small change in high flow season discharge => little effect, lower high flows could result in smaller flodding and wetland area causing reduced fish biomass	0
Blue_Bifresh	Exp39	Low	0.62	0.82	0.78	100		Relatively small change in low flow season discharge => little effect, in general low flow results in warming and reduced oxygen content which could affect fish biomass	0
Blue_Bifresh	Exp42	High	0.736667	0.786667	0.77	100	No	Nonlinear flow-ecology relationship starting slowly, less sensitivity to changes in high flows but already at a level of significant change while still within the safe limit	40	Related to environmental flow requirements	a, b, d, c, e	Yes, especially if it affects fish migration
Blue_Bifresh	Exp42	Low	0.736667	0.786667	0.77	100		More sensitivity to low flows, but still at higher level, might still be close to natural interannual variability	60	Related to environmental flow requirements
Blue_Bifresh	Exp45	High	0.68	0.805	0.78	100	Where fish depend on regular flow	if fish strongly depend on this flow	50	fish mortality can strongly increase at such low level	nice and plausible list, order okay; but for low flow; e) may rarely apply as we talk about the high flow season here, but in the low flow season it should be first on the list
Blue_Bifresh	Exp45	Low	0.6875	0.7875	0.75	100		where fish depend on the regular low flow	30	fish mortality can strongly increase at such low level
Blue_Biocean	Exp16	High	0.8	0.8	0.8	100	not specific	marine biodiversity not likely to be impacted	0
Blue_Biocean	Exp16	Low	0.8	0.8	0.8	100		marine biodiversity not likely to be impacted	0
Blue_Biocean	Exp23	High	0.0333333	0.866667	0.7	100	no	High discharge carry many nutrients into coastal zones that species may depend on. In Arctic regions additionally high discharge transport also heat into adjacent coastal area enabling establishment of specific temperate species assemblages. For salmon dominated areas high flow season important for migration and repoduction into spawning area	60	High flow seasonal discharge should not change <50% in order to maintain abovementioned services	a) e) d) b) c) -> not sure how higher heat transport can inrease keystone fish biomass as these are often highly adapted to existing temperature regime	yes, high heat transport from central continents to e.g. arctic areas can change artic environments massively. This is already observed in e.g. Lena, Ob and Yenisey delta and McKenzie river. Global change lead to more heat transport but also to more discharge as many rivers origin from glaciers. This has specially effects in Arctic regions creating warm, fresh water layer on top of ocean preventi…
Blue_Biocean	Exp23	Low	0.45	0.85	0.75	100		assuming still affect but less strong decrease in Ocean fish biomass due to decrease of nutrients into coastal waters enhancing primary production increasing food availability for fish	10	Probably very little if at all relevance
Blue_Biocean	Exp26	High	0.8	0.8	0.8	100	no	very little I guess	0
Blue_Biocean	Exp26	Low	0.8	0.8	0.8	100		very little I guess	0
Blue_Biocean	Exp37	High	0.55	0.81	0.75	100	No	high flow season discharge can drive seasonal changes in the sources of energy supporting fish biomass	63		acbde	No
Blue_Biocean	Exp37	Low	0.64	0.8	0.76	100		low flow season discharge can drive seasonal changes in the sources of energy supporting fish biomass	93
Blue_LSC	Exp14	High	78.3333	91.6667	85	100	no	While flow is important for downstream habitat, the direct impact on forest cover should not be as great as for eg green water. A decline in flow may mean a decline in riparian communities	0	I don’t see an interaction here	e>c>f>a>d>b	No, I dont think so
Blue_LSC	Exp14	Low	88	92	88	100		I think that during low flow, a small decline will have little impact on neighboroughing forest cover	0	I'm not sure that tipping point would occur to neighbouring forests from a decline in low flow
Blue_LSC	Exp16	High	90	90	90	100	no specific	no link	0
Blue_LSC	Exp16	Low	90	90	90	100		no link	0
Blue_LSC	Exp21	High	75.7143	90	90	100	No region specifically in mind	Less water available to forest likely a bad thing	0	I don't have a good estimate for this	A F E C D B
Blue_LSC	Exp21	Low	75.7143	90	90	100		No reason to alter by season	0	I don't have a good estimate for this
Blue_LSC	Exp23	High	30	70	50	100	No, mainly arid forest areas and estuaries	Changes in high flow season may be essential for refill depleted ground water tables but also to maintain tree speices in arid environments	40	In arid areas regular flooding of forest areas essential	a) + e) same mechanisms but filling different stocks f) d) c) b)	no
Blue_LSC	Exp23	Low	40	120	80	100		Maintenance of minimum environmental flow requirements essential for forest maintenance	90	Very essential to keep minimum flow for all forrests
Blue_LSC	Exp24	High	90	90	90	100	No	Cannot think of a mechanism	0
Blue_LSC	Exp24	Low	90	90	90	100		Cannot think of a mechanism	0
Blue_LSC	Exp33	High	80	100	90	100	no	A reduction in high flow discharge reduces floods, which may prevent waterlogging and may thus be beneficial for forest cover. However, I suspect that a decrease from 65% to 60% would have little effect in this regard. Possibly it may even have a negative effect given the already large decrease from the pre-industrial value. Therefore, I assume no effect (thus 90% forest cover), but I acknowledge…	50	The effect can be highly nonlinear if at a certain lowering of the water table trees start to die from hydraulic failure or carbon starvation. The value of 50% is, however, a mere guess.
Blue_LSC	Exp33	Low	82.8571	90	90	100		A reduction in low flow probably has negative effect on nearby forest cover via a lowering of the water table. Assuming that most forests will be resilient to a temporary and relatively small lowering of the water table associated with a change from 95 to 90% in discharge, I estimate the effect to be small. Therefore, my best estimate is no effect, but this can be up to 5 percentage points in nea…	50	The effect can be highly nonlinear if at a certain lowering of the water table trees start to die from hydraulic failure or carbon starvation. The value of 50% is, however, a mere guess.
Blue_LSC	Exp35	High	76.6667	93.3333	85	100	water meadow and delta systems with forest cover. no specific region	Only applies to forests depending on water supply by inundation of fluvial systems, thus water meadows and delta systems	0		1. a) -> 2. e) -> 3. c) -> 4. d) -> 5.f ) -> 6. b) Order is variable depending on the surrounding ecosystem and geomorphology. A riparian community depending on seasonal inundations is having different requirements and vulnerabilities than a forest patch situated on a steep slope.
Blue_LSC	Exp35	Low	53.3333	86.6667	70	100		same as high flow, but in case growing season and low flow months overlap, the impact is way higher.	0
Blue_LSC	Exp36	High	81.6667	98.3333	90	100	none	I don't think a 5% change in high flow season discharge will have a large impact on forest cover. It may change what tree species are found	30	a significant reduction in high season flow may completely change the surrounding ecosystem	c,f,a,e,d,b The mechanisms of riparian communities and sediment transport are context dependent. In the former, it will only increase forest cover in riparian areas, in the latter, this is only relevant in mangrove and deltaic areas. Air moisture increase leading to increased forest cover is likely a very small effect.	Certainly the sediment transport going out to oceans and deltas are likely to have cascading effects in other ecosystems (impacting water quality and coastal biodiversity for example)
Blue_LSC	Exp36	Low	68.3333	93.3333	85	100		I think a decrease in low flow discharge has a greater impact on forest cover than decrease in high flows. However I don't think a 5% decrease will make a huge change	50	A significant reduction in low flows can lead to drought conditions and thus reduced forest cover
Blue_LSC	Exp37	High	75	93	85	100	No	seasonal decrease in high flow season discharge will reduce nearby moisture and affect forest growth	63		abdcef	No
Blue_LSC	Exp37	Low	75	91	85	100		seasonal decrease in low flow season discharge will reduce nearby moisture and affect forest growth	93
Blue_LSC	Exp48	High	78.75	91.25	85	100	None.	This depends a lot on soil properties, species, evaporation process, so it is a rough estimate	90	Always non-liner
Blue_LSC	Exp48	Low	68.75	87.5	75	100		The response is larger in a low flow season given a potentially water stressed condition for species.	90	Always non-liner
Blue_LSC	Exp45	High	87.8889	90.1111	89	100	no	only for river-near forests (mangroves, macrofauna), but locations are rare where this may be the case at large scale	0	no tipping	I do not see how a) would work, so it could go to the end of the list
Blue_LSC	Exp45	Low	90	90	90	100		I can hardly imagine an influence	0	no tipping
Blue_Biog	Exp11	High	0.473333	0.526667	0.5	100	US Upper Midwest	I don't think there would be a direct impact of changes in high flows on biogeochemical flows. I think that they could both be a symptom of the same change (for example, more intense storms could lead to an increase in high flows and an increase in nitrogen runoff), but I don't think the change in high season discharge itself would affect nitrogen concentration in runoff from nearby areas.	0		No mechanisms	No mechanisms
Blue_Biog	Exp11	Low	0.473333	0.526667	0.5	100		Same reasoning as high flows. I don't think there would be a direct impact of changes in low flows on biogeochemical flows. I think that they could both be a symptom of the same change (for example, increased temperature could lead to greater PET, lower low flows, and less nitrogen in runoff), but I don't think the change in low flows itself would affect nitrogen concentration in runoff from near…	0
Blue_Biog	Exp14	High	0.5	0.5	0.5	100	No	As N is leaching from land to river, I don't see a mechanism for reduced flow leading directly to reduced leaching	0	I don’t see a mechanism here
Blue_Biog	Exp14	Low	0.5	0.5	0.5	100		As N is leaching from land to river, I don't see a mechanism for reduced flow leading directly to reduced leaching	0	I don’t see a mechanism here
Blue_Biog	Exp16	High	0.5	0.5	0.5	100	not specific	run off not really impacted by river flow	0
Blue_Biog	Exp16	Low	0.5	0.5	0.5	100		run off not likely impacted by river flow	0
Blue_Biog	Exp23	High	0.3	0.7	0.5	100	no	Blue water discharge has not effect on biogeochemical flows. High discharge levels may have a little effect on leaching due to retainment effects	0	no tipping
Blue_Biog	Exp23	Low	0.4	0.6	0.5	100		Blue water discharge has not effect on biogeochemical flows. Low discharge level may even have less influence	0	no tipping
Blue_Biog	Exp24	High	0.5	0.5	0.5	100	No	Cannot think of a mechanism
Blue_Biog	Exp24	Low	0.5	0.5	0.5	100		Cannot think of a mechanism
Blue_Biog	Exp25	High	0.5	0.5	0.5	100	Anyone	I cannot see a biophysical direct effect of water discharge on upland N runoff	0
Blue_Biog	Exp25	Low	0.5	0.5	0.5	100		I cannot see a biophysical direct effect of water discharge on upland N runoff	0
Blue_Biog	Exp30	High	0.5	0.5	0.5	100	no	There is no causal relation between the amount of water in a stream and the nitrogen contration in runoff, mainly due to the flow path of water (runoff turns into streamflow and not vice versa). There would be an impact of runoff on nitrogen concentration in the stream	0	no causal relationship
Blue_Biog	Exp30	Low	0.5	0.5	0.5	100		There is no causal relation between the amount of water in a stream and the nitrogen contration in runoff, mainly due to the flow path of water (runoff turns into streamflow and not vice versa). There would be an impact of runoff on nitrogen concentration in the stream	0	no causal relationship
Blue_Biog	Exp37	High	0.5	0.5	0.5	100	No	decrease in high flow season discharge will reduce energy supply that need to dilute nitrogen concentration in runoff	62
Blue_Biog	Exp37	Low	0.5	0.5	0.5	100		decrease in low flow season discharge will reduce energy supply that need to dilute nitrogen concentration in runoff	92
Blue_Green	Exp11	High	79.3333	96	93.5	100	For the overbank flooding example, I was thinking of the historical importance of Nile River flooding on agriculture in the Nile Delta. Thinking about it in the context of irrigation, I didn't have a specific region in mind.	I would expect there to be a minor influence of high flow season discharge on soil moisture in surrounding lands. In lowland settings where flooding is a significant soil moisture replenishment mechanism, then a decrease in discharge could lead to a substantial decrease in soil moisture nearby. However, in locations where the discharge is decreasing due to irrigation, I would expect soil moisture…	100	I think this interaction would always be nonlinear and strongly influenced by local, site-specific conditions because of the lack of a direct causal link between the two.	a,c,b - I view these three distinct mechanisms as basically the same thing... Increased discharge leading to flooding which causes infiltration and groundwater recharge	These effects would likely be confined close to the river channel, and therefore unlikely to change precipitation enough to have any downwind effects. However, they could have very significant and important impacts on terrestrial and aquatic biodiversity locally.
Blue_Green	Exp11	Low	88.75	95	95	100		I do not see a clear pathway by which changes in low-flows could impact soil moisture in the surrounding land. If the reduction in low-flows was accompanied by a significant change in river stage, that could lead to a decline in the water table and corresponding reduction in soil moisture as has been shown in some case studies in wet meadows. However I do not think this would be a significant mec…	0	I do not think there is a direct relationship so linear/nonlinear distinction does not apply.
Blue_Green	Exp13	High	89.4444	95	95	100	no	The question is somewhat odd as the high flow season discharge decrease would in reality be related to a changed soil moisture. The reduction indicates in fact that there has likely been a reduction in soil moisture already (due to reduced rainfall?). However, as a mechanism I could imagine a river to be infiltration to soil moisture at some low-lying areas, but the effect is probably small durin…	0	I don't see the tipping	c, a, b b doesn't make any sense as ground water recharge leads to more river discharge - in the low flow season - and not the other way around.	Mechanisms c and a could cascade downstream and there could also be tipping even when flooding happens will be very case specific
Blue_Green	Exp13	Low	79.2632	95.0526	94	100		The question is somewhat odd as the low flow season discharge decrease would in reality be related to a changed soil moisture. The reduction indicates in fact that there has likely been a reduction in soil moisture already (due to reduced rainfall?). However, as a mechanism I could imagine a river to be infiltration to soil moisture at some low-lying areas. During low flow season (river fed by gr…	0	I do not think this would be non-linear
Blue_Green	Exp14	High	80	90	90	100		Modest decline in flow likely to have only very little impact on green water as water flowing from soils to rivers	0	I don't see a mechanisms here	c>b>a	No
Blue_Green	Exp14	Low	95	95	95	100	No	I think during low flow period, there will be little impact on soil moisture except for most immediate areas	0	I don't see a mechanisms here
Blue_Green	Exp16	High	95	95	95	100	no specific region	I think green water flows to blue water	0
Blue_Green	Exp16	Low	95	95	95	100		blue water does not flow to green water except via irrigation	0
Blue_Green	Exp15	High	89.4444	95	95	100	no specific region	Reduction in high flow will reduce infiltration, groundwater recharge and the soil moisture thus reducing the green water. But I would expect the effect to be very small.	40		1. c) 2. b) 3. a)
Blue_Green	Exp15	Low	86.6667	95	95	100		I don't think of a reason	0
Blue_Green	Exp21	High	73.3333	98.3333	90	100	None	Less environmental flows would likely lead to declines in soil moisture in areas around waterways	0	I don't have a good estimate for this	A B C
Blue_Green	Exp21	Low	70.7143	99.2857	85	100		Likely worse in low flow season when there is less precipitation	0	I don't have a good estimate for this
Blue_Green	Exp23	High	40	120	80	100	no	Water provision to soil during high flow very likely and important for many water adjacent areas as well as flood plains . Also importnt for filling up ground water levels	60	Too strong reduction may prevent areas to be flooded to provide esesential soil water and ground water replenishment	a) b) c) -> more systemic generalized statement of a) + b) but more spatially explicit
Blue_Green	Exp23	Low	20	120	60	100		Water provision to soil during low flow very likely and important for many water adjacent areas to maintain minimum environmental flow requirement Also important for filling up ground water levels	80	Too strong reduction may prevent areas to be flooded to provide essential soil water and ground water replenishment
Blue_Green	Exp24	High	95	95	95	100	No	Cannot think of a mechanism	0
Blue_Green	Exp24	Low	95	95	95	100		Cannot think of a mechanism	0
Blue_Green	Exp30	High	95	95	95	100	none	No biophysical causal relation due to flow path of water from soil to stream	0	No biophysical causal relation due to flow path of water from soil to stream.
Blue_Green	Exp30	Low	95	95	95	100		No biophysical causal relation due to flow path of water from soil to stream. In case of irrigated agriculture, a decrease in low flow could lead to less irrigation and thus soil moisture.	0	No biophysical causal relation due to flow path of water from soil to stream.
Blue_Green	Exp36	High	82.3077	105.385	90	100	None	Reduced high flow will result in lower recharge and overall drying of surrounding soils	30	Strong reduction in discharge will lead to surrounding soils losing more water to maintain environmental requirement	a, b, c	Cascading could be possible perhaps through groundwater recharge as this may impact groundwater levels extending beyond the hypothetical river basin.
Blue_Green	Exp36	Low	72.3077	95.3846	80	100		Reduction in low flows will have a greater impact on surrounding lands soil moisture conditions than reduction in high flows.	65	I think growing soil moisture is quite sensitive to low flow reductions.
Blue_Green	Exp37	High	81.6667	96.6667	90	100	No	decrease in high flow season discharge will reduce soil moisture on nearby land directly	62		acb	No
Blue_Green	Exp37	Low	80	98	90	100		decrease in low flow season discharge will reduce soil moisture on nearby land directly	92
Blue_Green	Exp39	High	77	97	93	100	No	reduced flooding results in lower soil moisture	0
Blue_Green	Exp39	Low	86	96	94	100		Declining groundwater tables result in lower soil moisture, small change in low season discharge => small effect	0
Blue_Green	Exp42	High	92	95.3333	94.5	100	No	The opposite flow direction, i.e. from green to blue water, is more likely	0		c, a (b seems strange, as water has to flow through the soil to reach the groundwater)	Rather not
Blue_Green	Exp42	Low	94.1667	95	95	100		River infiltration occurs during high flows rather than low flows	0
Blue_Green	Exp45	High	91.6667	95	95	100	I realize a) could occur in both seasons in regions with large inundation areas, hence I slightly adapted my estimates	little direct effect, just that somewhat lower flooding affects very close land areas	20	see above effect - in areas where adjacent land depends on flooding	okay
Blue_Green	Exp45	Low	93.8889	95	95	100		little change expected, especially within this interval	0	(no such tipping expected)
Blue_Green	Exp49	High	76.6667	96.6667	90	100	none	The cause of the decreased high season flow could relate to changes in climate, vegetation cover, and land use, and these factors could also impact growing season soil moisture. The main process based link between high season flow soil moisture which I identify are instances where there is groundwater and surface water interaction, where surface water is a source of soil moisture.	0
Blue_Green	Exp49	Low	95	95	95	100		I would not except a decrease in low flow season discharge to have an effect on growing season soil moisture, directly. The decrease in baseflow could be due to increased evapotranspiration, from increased productivity and/or higher temperatures, or changes in groundwater-surface water interactions. Changes in growing season soil moisture might alter low flow season discharge, but I don't see a c…	0
Blue_Green	Exp31	High	94	95	95	100	None	changes in blue water do not imply changes in green water. It is rather the opposite.	20	just a wild guess, but I would still say it is not causal
Blue_Green	Exp31	Low	94	95	95	100	None	I think it is a bit difficult to see that implications without proper hydrological modelling	0.01	just a wild guess, but I would still say it is not causal
Green_Biland	Exp13	no	87	100.333	94.5	100	no	Altered soil moisture dynamics likely affect the BII, but the relatively small change does probably not effect it that much	75	I adapted the non-linearity estimate upward after the discussion	b,a,c,d	No, the scale of the hypothetical area itself should be larger to have cascading effects beyond the size of the hypothetical area.
Green_Biland	Exp14	no	84	90.6667	88	100	Tropical rainforest	A decline in soil moisture will lead to shifts in vegetation change and likely a contraction in forests. Loss of habitat will therefore lead to an indirect decline in forest communities. However, in wetlands, a decline in soil moisture may lead to direct decline in specially wetland adapted species directly.	70	Recent evidence has suggested that the Amazon is already becoming more arid. Which will increase fires and destruction of more habitat. but loss of trees through less soil moisture would be a direct impact?	b > c >a > d	Probably not with a 5% decline but a larger decline, certainly yes
Green_Biland	Exp16	no	87	97	93	100	No specific region	Less soil moisture could lead to loss of food and habitat and opportunity for weeds to become introduced	0
Green_Biland	Exp21	no	63.3333	96.6667	90	100	Amazon and Australia	Declining moisture, and ability of ecosystems to maintain microclimates may make them more prone to droughts, and susceptible to fires	0	I don't have a good estimate for this	A B D C
Green_Biland	Exp23	no	47.5	85	60	100	No special regions in mind but insights strongly visible peats, wetlands, forests, grasslands	Change in soil moisture will have long and short term effects on above ground vegetation and ecosystem functioning and thus will probably strongly alter BII	90	Change in soil moisture has known strong consequences on above ground vegetation	c) -> local effects d) -> large scale regional effect b) a) -> specific problematic to grazers only	yes, d) is needed to keep internal moisture recycling active to prevent and buffer droughts and fires -> once threshold is crossed drought fire may change complete region from forest state to savanna with effects on global moisture recycling (change of precipitation pattern elesewhere creating droughts and fires)
Green_Biland	Exp26	no	50	100	90	100	no	This is so context dependent! In semi-arid or dry climates any further reduction can be devastating, but in humid places a reduction might even be beneficial	0	Cannot answer
Green_Biland	Exp35	no	49.2857	92.1429	85	100	Sahel Amazon, Australia (wild fires)	Water is the blood stream of the biosphere, highly depending on the humidity of the ecosystem with way higher and most likely already non-linear effects in arid regions.	85	Risk of wilting and a general reduction in biomass accumulation. These can cause a lack of fitness of species with a high water stress sensitivity and thus disadvantage against competitors. Furthermore, there is a detrimental effects on moisture recycling feedback.	1. a -> 2. c -> 3.d -> 4b OBS: high uncertainty in my ranking.	d) is working on an ecosystem to regional scale with the potential to have global effects -> release of CO2 release of wild fires
Green_Biland	Exp37	no	80	98	90	100	No	decrease in growing season soil moisture will affect the plant growth, and destroy the habitat, therefore, reduce BII	92		bacd	No
Green_Biland	Exp45	no	83.3333	96.6667	90	100	no	I expect only a slight change in this particular range, BII only being indirectly affected	50	a point where more dramatic nonlinear changes may happen, as soil moisture would be halved	b) first and a) last, because the food link appears to me as a low-order effect
Green_Bifresh	Exp11	no	0.656923	0.810769	0.78	100	US Great Plains	I think that a decrease in growing season soil moisture would also be associated with a decrease in groundwater recharge and therefore potentially a decrease in low flows. As a result, I think that keystone fish biomass would decrease, but because this would be buffered by the several intermediate steps mentioned above, the response would be fairly small.	80	I think once soil moisture decreased substantially, to about 80% or so, the impacts on groundwater recharge and streamflow would be more substantial. This is just a gut feeling - not backed by any data that I'm aware of.	b,c,d,e,a	Yes, the changes in river discharge as well as the changes in nutrient flow could have downstream impacts on other river and coastal ecosystems
Green_Bifresh	Exp14	no	0.466667	0.733333	0.6	100	None	Decline in growing season soil moisture would lead to a decline in water availability for rivers and lakes, and potential stresses on fish. Also, a decline may also lead to a decline in nutrients being delivered so a decline in aquatic productivity as well.	65	A decline by over one third could possibly lead to significant changes in lakes especially in endorheic regions, or regions where climate is expected to become more arid in the near future	d=e> b=c> a	i don't think so. Unless a mechanism has been determined for BI Fresh on BI Land from other peoples responses
Green_Bifresh	Exp23	no	0.35	1.15	0.85	100	No	No direct effects but decrease in soil moisture may decrease water run-off provision for nearby freshwater and may alter geochemical flows to the watersystem	60	Not strong directly effect with little coupling but indirectly as most rivers/lakes depend on surface runoff	d) e) b) a)	no
Green_Bifresh	Exp37	no	0.55	0.81	0.75	100	No	decrease in growing season soil moisture will affect nearby plants growth, and therefore, some food supply for freshwater ecosystems	93		cbdae	No
Green_Bifresh	Exp45	no	0.771429	0.8	0.8	100	no	I expect little direct change - unless river flow would change for the same reason than soil moisture, e.g. in a sever longterm drought	50	just a qualitative guess of the average response, it would much depend on the local cirucmstances	I suggest put d) first, and a) last - but maybe I do not understand what food availability relates to here? Food for whom
Green_Bifresh	Exp16	no	0.72	0.82	0.78	100	No specific region	Less soil moisture could lead to less drainage to freshwater and potentially impact water quality	0
Green_Biocean	Exp16	no	0.8	0.8	0.8	100	No specific region	no significant link	0
Green_Biocean	Exp23	no	0.8	0.8	0.8	100	no	Very unlikely	0	no tipping point	b) a) -> difficult to judge as both effects may play larger roles depending on ecoystem -> nutrient limited temporal and boreal regions more affected by b); productive warm water tropical regions more affected by a)	no
Green_Biocean	Exp26	no	0.8	0.8	0.8	100	no	probably not a lot	0
Green_Biocean	Exp37	no	0.55	0.81	0.75	100	No	decrease in growing season soil moisture will affact plants growth, and therefore, reduce fish biomass in nearby coastal ecosystems	93		ab	No
Green_Biocean	Exp45	no	0.771429	0.8	0.8	100	no (upper catchments mangroves excluded)	even weaker response than for river systems as such	30	loose links, except in coastal-near areas (mangroves etc.)	okay (if food availability is made clear - I assume food that eventually serves the fish, who however rely on plankton mostly)
Green_LSC	Exp13	no	74.8586	90.0101	89	100	Tipping is expected in already moisture-limited ecosystems earlier then in energy-limited ecosystems, but those might become moisture limited as well at certain reduction levels	Decrease in soil moisture will surely not lead to increased forest cover, but the soil moisture reduction would probably not be signifcant to give a huge change	70	Depends on the region really, but a reduction of the soil moisture would at some point lead to system that cannot support the high forest cover anymore	a,b	No, the scale of the hypothetical area itself should be larger to have cascading effects beyond the size of the hypothetical area.
Green_LSC	Exp14	no	66.6667	93.3333	80	100	No	A change in seasonal moisture would see significant change in habitat and forest cover. This would be a non-linear process, as a loss in forest cover would then lead to even less green water being produced.	70	As above - a decline in precip leading to a decline in trees could result in a decline forest-generated ET	a>b	I'm not sure.
Green_LSC	Exp16	no	83	91	89	100	Australia	Drying of soil may increase likelihood of wildfire	0
Green_LSC	Exp21	no	70.7143	92.1429	85	100	Australia and Amazon	Declining rainfall can lead to more droughts and forest fires which could potential reduce land cover	65	Increased droughts and dry conditions can contribute to more forest and bush fires that can drive down forest cover	A B
Green_LSC	Exp23	no	40	120	80	100	No	Changes in soil moisture essential to maintain forest	60	To strong decrease in soil moisture does will reduce important water transpiration and evapotranspiration in tree species	b) a)	yes, decrease in soil moisture can promote fires and massively change forest cover leading to changes in moisture recycling patterns changing precipiatation pattern elsewhere . leading to droughts or floodings elsewhere and may alter ecoystems remotely
Green_LSC	Exp24	no	85.3333	90.6667	88	100	No	I do not anticipate that such a small change in soil moisture will have a great effect on forest cover	30	The relationship between water stress and plant physiology is non-linear, so that as available water decreases, physiology is affected slowly at first, but then exponentially.	a, b
Green_LSC	Exp26	no	81	91	89	100	no	Totally depends on the climate zone. Not really possible to answer without further context	0
Green_LSC	Exp33	no	84.7368	90	90	100	no	A reduction in growing season soil moisture from 95% to 90% will affect the forest (e.g. C sink), but rarely forest cover. Therefore, my best estimate is that this reduction will not lead to permanent loss of forest through e.g. massive hydraulic failure, fires, or insect outbreaks. As upper bound of the effect I estimate a linear relation, that is, -5 percentage point change in forest cover (upp…	46	A recent paper by Berdugo et al. (2020, Science) estimated a threshold in vegetation productivity at an aridity level of ~0.54, where aridity was defined as 1 - (precipitation/potential evaporation). Even though the definition of the green water control variable differs from precipitation in the above aridity definition, I here assume them to be equivalent, resulting in a value of 46% soil moistu…	a - b
Green_LSC	Exp35	no	66.25	91.25	85	100	Central europe	Depending on the resilience of the forest biome, a 5% decrease of soil moisture will most likely not affect the tree coverage very much. However, consistent water stress over multiple years even could cause a forest succession of more aridity resistant species and thus even trigger biome shifts.	0		1. a) -> 2. b) High uncertainty between the order of the two. While water stress has enduring and potential mortal consequences on individual species, wildfires are affecting a large scale and also species that might be more resistant to water stress.	wildfires - with potential ecological succession.
Green_LSC	Exp36	no	83	99.6667	88	100	None	I don't think a 5% soil moisture reduction will have a large impact on potential forest nearby	10	A very low soil moisture indicates extremely low water availability in the system	a, b For wildfires to increase due to soil moisture loss it needs to drop to significantly lower levels but that is an important mechanisms that can impact forest cover.
Green_LSC	Exp37	no	75	91	85	100	No	decrease in growing season soil moisture will affect forest growth directly.	92		ab	No
Green_LSC	Exp38	no	80	100	90	100	Tropics and drylands	Q1. If neighboring forest entirely relies on moisture from the areas where soil moisture has decreased, and has very low resilience. This does not account for indirect effects such as fire, that could decrease forest cover more. Q2. Decrease in soil moisture could increase rainfall locally in neighboring areas through convective processes. Q3. A change in soil moisture by 5 % will likely have ver…	0	Difficult in terms of level of soil moisture relative pre-industrial. Alternatively, 30 % of areas with considerable soil moisture change (Lawrence et al., Fig B1) or 0.54 in aridity (1-P/Epot) at which point drylands enter a vegetation decline phase where small changes in aridity leads to rapid changes in photosynthesis decline etc (Berdugo et al., 2020).
Green_LSC	Exp45	no	86.25	90	90	100	rainforest vs. summergreen forest in particular (Amazon, Sahel...)	such a small change unlikely to lead to forest cover less except in highly sensitive areas (forests close to savannahs)	70	I assume the response (forest cover loss vs. soil moisture decline) is nonlinear, so that relatively early a tipping point may be reached	okay	if the phenomenon is large-scale and even forest dieback occurs (unlikely in the proposed range of change though), climate-mediated effects in other regions might happen
Green_Biog	Exp11	no	0.32	0.52	0.48	100	US Midwest agriculture	Decreased soil moisture would generally lead to a decrease in drainage through the bottom of the root zone, which would be accompanied by a decrease in nitrate leaching. I am not a biogeochemical expert so don't have very much confidence in the strength of the relationship, nor can I assess how/whether it would be nonlinear, but I do think I have a good idea about the direction of change (reducti…	0		a,b,c,	Yes, all of these changes in nitrate leaching could load to eutrophication of downstream water bodies (freshwater or ocean) which would have effects on ecosystems.
Green_Biog	Exp14	no	0.283333	0.416667	0.35	100	Likely to have a bigger impact in semi-arid and endorheic regions	A decline in green water will lead to a decline N being leached due to both direct impact, but also potential less vegetation cover too.	70	For N to be reduced to such an extent, a major decline in green water is needed.	b> a > c	I dont think so
Green_Biog	Exp16	no	0.41	0.51	0.49	100	very dependent on rainfall pattern, soil type and topography	Less soil moisture may lessen likelihood of loss of nutrient by runoff or drainage	0
Green_Biog	Exp21	no	0.35	1.15	0.55	100	None	Decreased soil moisture may lead to more need for irrigation. Drier conditions may also be more prone for erosion or flash flooding which could lead to more runoff	0	I don't have a good estimate for this	B A
Green_Biog	Exp23	no	0.5	0.5	0.5	100	No	Unlikely to have effect	0	No effect likely	b) a) Is c) missing? Nitrogen fixation is only relevant in temperate areas with high leguminoses and N-fixating bacteria	no
Green_Biog	Exp25	no	0.475	3.01667	0.475	100	Rainfed cereal basins, under temperate or Mediterranean climate	Lower green water is generally associated with less N leaching. I have estimated a reduction of 5% in the leaching. Anyhow if this lower green water is also associated with an increase in extreme phenomena, for example, less total water input but concentrated in extreme precipitation events, N leaching could trigger. To avoid that leaching N rates should be adapted to new conditions (e.g. Quemada…	0	This will depend on the magnitude of extreme events	b, a, c N in leaching is generally the dominant pathway therefore b) Anyhow important diversity could be observed when comparing different agricultural systems and agroclimatic conditions
Green_Biog	Exp26	no	0.32	0.52	0.48	100	no	reduced soil moisture lead to reduced runoff and thus reduced nutrient leaching	0
Green_Biog	Exp37	no	0.51	0.67	0.53	100	No	decrease in growing season soil moisture will reduce the ability of nitrogen fixation, and increase the leached nitrogen concentration in runoff in nearby areas	92		ab	No
Green_Biog	Exp39	no	0.45	0.85	0.55	100	No	Reduced soil misture results in reduced percolation and therefore higher nutrient content in drainage water	0
Green_Blue	Exp11	High	40	100	70	100	I was generally thinking about the US Midwest (corn belt region).	A decrease in growing season soil moisture could be driven by conversion of natural vegetation to rainfed agriculture or urban, both of which could increase direct runoff to streams and therefore increase high-season flows. However, depending on the rainfall regime, there could also be an increase in storage capacity within the root zone, therefore leading to less direct runoff and lower dry-seas…	95	I think this relationship would be nonlinear at any level of soil moisture change, and the degree and type of nonlinearity would be dependent on the prevailing precipitation regime, and the type of land use change that led to the change in soil moisture.	c,b,a,e,d	The changes in discharge would have impacts on downstream water bodies and ecosystems. The changes in precipitation could also have impacts on terrestrial ecosystems in surrounding areas.
Green_Blue	Exp11	Low	80	103.077	80	100		A decrease in growing season soil moisture may also correspond to a generally drier soil profile and a reduction in groundwater recharge. Therefore, I think a reduction in soil moisture would be assoicated with a decrease in low-flows (unless it was an unusual case where the reduction in soil moisture was caused by a transition from irrigated agriculture to rainfed agriculture, in which I would e…	100	As with my response for high flows, I think the relationship between soil moisture and river flows would always be nonlinear.
Green_Blue	Exp13	High	54.6316	65.1579	62	100	The question is somewhat tricky, because it really depends on whether the growing season coincides with the high flow (e.g. Sahel) or with the low flow season (e.g. Europe)	Assuming the growing season coincides with the high flow season, a reduced soil moisture will reduce flood peaks and flows in general. Especially if we assume that reduced soil moisture also coincides with reduced groundwater levels.	100	By definition the relation between soil moisture and river flow is a non-linear one	a, e, b, c, d	d could, at very large scale, however, the hypothetical area is so small it would go unnoticed.
Green_Blue	Exp13	Low	69	99	91	100		Assuming the growing season coincides with the low flow season, a reduced soil moisture will reduce flood peaks, but these are limited, so if we assume that reduced soil moisture is approximately linearly related to groundwater, then the flow response is also about linear in terms of total volume per unit of time. However, the response in the headwater could be rather non-linear reducing the flow…	100	By definition the relation between soil moisture and river flow is a non-linear one
Green_Blue	Exp14	High	54	60.6667	58	100	semi arid and endorheic regions	Decline in soil moisture will mean less water available for flow in general. Less soil saturation will mean less flow too.	70	Significant declines will result in major changes to river flow, especially in semi arid and endorheic regions	I'm not sure I follow all the mechanisms above . For example, c), how can a decline in runoff lead to greater river discharge. I must be missing something?
Green_Blue	Exp14	Low	78.3333	91.6667	85	100		Decline in soil moisture will mean less water available for flow in general. Less soil saturation will mean less flow too. During low flow season, this effect could be substantial	70	Significant declines will result in major changes to river flow, especially in semi arid and endorheic regions
Green_Blue	Exp16	High	40	70	60	100	not related to region, but to soils, topography, and rainfall pattern	Lower soil moisture will potentially lead to lower drainage to groundwater	0
Green_Blue	Exp16	Low	80	100	90	100		less soil moisture could impact drainage to groundwater	50
Green_Blue	Exp15	High	40	80	60	100	global	any rain falling on dry land or on land where the soil moisture is low will be using to fill the soil moisture first before it goes to runoff	0		b) ; c); d); e); a)
Green_Blue	Exp15	Low	60	110	80	100		the little rain that falls on the land will be used for filling the soil moisture. The overall effect is minimal as the flow was already low	0
Green_Blue	Exp21	High	40.7143	69.2857	55	100	None	Lower soil moisture would likely lead to more demand for water for irrigation reducing discharge	0	I don't have a good estimate for this	C D B A E
Green_Blue	Exp21	Low	70.7143	92.1429	85	100		Low flow season may have more of an impact than high flow season	0	I don't have a good estimate for this
Green_Blue	Exp23	High	25	105	45	100	no	decrease in soil moisture may have some effect on high flow due to higher retention in soil may reduce run-off	80	Strong changes needed to have visible effects	c) d) b) a) e)	no
Green_Blue	Exp23	Low	45	115	75	100		Reduction in soil moisture may reduce run-off due to higher retention and uptake in soil	40	intermediate strong reduction needed to expect effect
Green_Blue	Exp24	High	65	65	65	100	No	Soil moisture is a stock, while discharge is a flow. So while the change in stock might cause a temporary change in discharge, I do not expect a permanent change.	0
Green_Blue	Exp24	Low	95	95	95	100		Soil moisture is a stock, while discharge is a flow. So while the change in stock might cause a temporary change in discharge, I do not expect a permanent change.	0
Green_Blue	Exp26	High	50	64	60	100	no	This is probably a more linear dependency, reductions in soil moisture and runoff reduce river discharge. But it depends on the water holding capacity of the soil and the runoff coefficient. If there is very little runoff anyways, discharge won't be affected	0
Green_Blue	Exp26	Low	86	94	90	100		This is probably a more linear dependency, reductions in soil moisture and runoff reduce river discharge. But it depends on the water holding capacity of the soil and the runoff coefficient. If there is very little runoff anyways, discharge won't be affected	0
Green_Blue	Exp30	High	61.5	65.5	64.5	100	Central Europe	Depends on whether the growing is the high flow or the low flow season. I my answer, I assumed that the growing season is mainly during the low flow season. Then, the streamflow in the high flow season is not significantly affected by decreased soil moisture in dry season as it is dominantly driven by precipitation outside of the growing season. There could be a very small decrease in flow during…	100	soil moisture-runoff-streamflow relation non-linear throught the range of values
Green_Blue	Exp30	Low	94	98	96	100		Depends on whether the growing season is the high flow or the low flow season. I my answer, I assumed that the growing season is mainly during the low flow season. Due to less water storage capacity due to compaction or erosion, evapotranspiration will very slightly decrease and runoff and thus streamflow increase during the low flow season	100	Relation between storage capacity and runoff is non-linear.
Green_Blue	Exp35	High	47.8571	62.1429	55	100	no specific region	lower availability of GW in the soil column will negatively affect surface and subsurface runoff, thus lowering river discharge. Lower GW availability will also impair moisture recycling which could also lower BW availability	0		1. a) -> 2. e) -> 3. b) -> 4. c) -> 5. d)
Green_Blue	Exp35	Low	77.8571	92.1429	85	100		lower availability of GW in the soil column will negatively affect surface and subsurface runoff, thus lowering river discharge. Lower GW availability will also impair moisture recycling which could also lower BW availability	0
Green_Blue	Exp36	High	58	68	62	100	None	A decrease in soil moisture of 5% will only have a marginal impact on high flows but these will reduce as there is more soil water capacity	10	Soil moisture will have to reduce quite significantly before it impacts high flows	e, a, b, c, d
Green_Blue	Exp36	Low	88.3333	96.6667	92.5	100		A small decrease in soil moisture will decrease low flows but only marginally	10	Large reduction in soil moisture will lead to severely reduced infiltration to deeper aquifer and can thus stop low flows altogether
Green_Blue	Exp37	High	57	65	63	100	No	decrease in growing season soil moisture will affect plants growth, and weaken regulation on season discharge	62		bcdea	No
Green_Blue	Exp37	Low	78	96	92	100		decrease in growing season soil moisture will affect plants growth, and weaken regulation on season discharge	62
Green_Blue	Exp28	High	60.9375	63.375	61.75	100	Semi-arid	A 5% drop in soil moisture will cause a maximum of 5% drop in blue water discharges	70	It would take a significant drop in greenwater soil moisture to cause large drop in high season flows	e), a), b), c), d); Assuming the increase is soil moisture is due to precipitation and not irrigation, Flood peaks will increase and cause increasing river discharge in the low season.	I think the above mechanisms can be applied at the basin scale; the d) mechanism can cause cascading effect only on the continental scale
Green_Blue	Exp28	Low	92.3611	94.4722	93.1	100		The impact on the low flow season would be smaller	50	A severe drop in soil moisture storage would bring low season discharges to minimum
Green_Blue	Exp39	High	40	70	60	100	No	Lower soil moisture results in lower discharge	0
Green_Blue	Exp39	Low	70	100	90	100		Lower soil moisture results in lower discharge	0
Green_Blue	Exp45	High	59.5	62	62	100	none	Some complex interactions - vegetation change resulting from the soil moisture change, overall drying that causes soil moisture to decline will also affect streamflow	50	At this point soils may be so dry that water can infiltrate leass easy,, causing more surface runoff, floods	okay, but preferably c) before b) as I think this is somewhat more important. For low-flow, b) should be first as groundwater is the main contributor to low flow
Green_Blue	Exp45	Low	88	96	94	100		I expect a somewhat lower influence at this high soil moisture level than in case of high flows though some sensitive interactions may occur here and there	30	under condition of overall dryness, especially if groundwater recharge is low (little baseflow contributing to river low flow)
Green_Blue	Exp49	High	63.3333	83.3333	70	100	none	The relationship between soil moisture, vegetation productivity, and surface water generation is key. Namely, does the decrease in green water result in less vegetation cover and more surface runoff, or does vegetation growth continue at average rates with little impact on surface water generation? High flow discharge reflects the response of an ecosystem to precipitation. The reduction in growin…	70	At 70% or less of pre-industrial levels I would expect a nonlinear response in potentially positive or negative directions- depending on if vegetation productivity continues, undergoes type change, or even collapses.
Green_Blue	Exp49	Low	76.6667	96.6667	90	100		The relationship between soil moisture and vegetation productivity is key, namely, does the decrease in green water make less water available for low flow discharge, or does it reduce vegetation growth and therefore transpiration, making more water available for low flow discharge, or do the impacts balance out, with no change in low flow discharge despite the decrease in soil moisture? Low flow …	70	At 70% or less of pre-industrial levels I would expect a nonlinear response in potentially positive or negative directions- depending on if vegetation productivity continues, undergoes type change, or even collapses.
Green_Blue	Exp42	High	62.3333	64.8333	64	100	None	Interflow is only a part of the stream flow, beside surface runoff and baseflow, and it is more important during high flows	0	b, a, c, e (d seems strange, you might have less soil moisture because of a higher evapotranspiration)	Downstream in the same catchment
Green_Blue	Exp42	Low	89.6667	95.5	93	100	None	Less soil moisture also implies less groundwater recharge and, therefore, less baseflow, and baseflow is more important for low flows	0
Green_Blue	Exp31	High	61	67	63	100	None	For the case of high flow, it is not that evident. First of all, it is possible that growing season and high flow season is not the same. But IO would say that for high flow the effect is not as strong as for low flow, as either way in high flow the blue water flow or runoff is considerably larger than in the low flow, so the effect of reduced soil moisture would not be as evident	80	Since the positive feedback between soil moisture and precipitation occurs through an increase in the frequency of storm events, I would say that the nonlinearity in places where there is a strong positive feedback between SM and P should be higher than that of low flow, so I say 80, a bit larger than that of low flow. See D’Odorico, P., Porporato, A., 2004. Preferential states in soil moisture a…	d-a-b-d-e	The only mechanism would be d), since it implies a positive feedback. Catastrophic bifurcations have been found at the regional scale where there are strong positive feedbacks between preceding soil moisture and precipitation. For the locations where these feedbacks may occur please refer to Dirmeyer, P.A., Schlosser, C.A., Brubaker, K.L., 2009. Precipitation, Recycling, and Land Memory: An Integ…
Green_Blue	Exp31	Low	89.1429	96.2857	92	100		If all the decrease in green water would become an equivalent decrease in blue water, then low flow would decrease also by 5%. However, this is not the case, because blue water flows can also have contributions by groundwater recharge. On the other side, blue water cannot decrease more than green water, as the latter depends on the first, so the highest causal decrease would be by 5%.	20	Just a guess, but the relationship may become non-linear where there are strong positive feedbacks between precedent soil moisture and precipitation, so that if soil moisture decreases, then precipitation would decrease, which would translate into a decrease of blue water.

## Sheet: mechanisms_&_literature
Interaction from	Interaction to	Mechanisms description	Relevant references	Link
BI land	BI fresh	Terrestrial biodiversity is interacting with freshwater fish via trophic relationships (predation from terrestrial animals) and via riparian habitat structure.	Correa & Winemiller (2018)	https://aquaticecology.tamu.edu/files/2018/05/242-Correa-W-2018-Terrestrial-aquatic-trophic-linkages-Oecologia.pdf
BI land	BI ocean	Terrestrial biodiversity interacts with coastal (keystone) fishes in mangrove forests. Decay of mangrove forests can negatively alter spawning and nursery grounds. Unfortunately, no quantitative link was established in the elicitation.
BI land	Land system change	Terrestrial biodiversity can positively impact with forest cover via decomposers, pollinators, pest control and seed dispersal. On the other side, some terrestrial animals consume seedlings thus, inhibiting new plant growth.	Albrecht et al. (2014)	https://www.nature.com/articles/ncomms4810
			Terborgh et al. (2008)	https://esajournals.onlinelibrary.wiley.com/doi/10.1890/07-0479.1
BI land	Biogeochemical flows	Terrestrial biodiversity serves as a pool of retaining nitrogen before it reaches surface waters.	Billen et al. (2018)	https://link.springer.com/article/10.1007/s10533-018-0455-9
BI land	Green water	Terrestrial biodiversity interacts with soil moisture via changes in the natural terrestrial vegetation. Decreased natural vegetation can decrease infiltration, water holding and root zone storage capacity.	Zemp et al. (2017)	https://agupubs.onlinelibrary.wiley.com/doi/10.1002/2017GL072955
BI fresh	BI land	Freshwater (keystone) fish can serve as prey for many terrestrial animals. In addition, an intact freshwater ecosystem provides ecosystem services important for terrestrial biodiversity.	Bilby	https://www.fs.fed.us/rm/boise/AWAE/labs/awae_flagstaff/Hot_Topics/ripthreatbib/bilby_intbtwnaqua.pdf
			Jepsen et al. (1998)	https://link.springer.com/article/10.1023/A:1017047527478
			Hvidsten & Lund (1988)	https://onlinelibrary.wiley.com/doi/abs/10.1111/j.1095-8649.1988.tb05453.x
			Dekar et al. (2013)	https://www.jstor.org/stable/42003852?seq=1#metadata_info_tab_contents
BI fresh	BI ocean	Freshwater and coastal environments are connected via trophic interactions. Depending on the migration direction, coastal (keystone) fish species can prey on or be prey to freshwater (keystone) fish species.	Beguer-Pon et al. (2012)	https://journals.plos.org/plosone/article?id=10.1371/journal.pone.0046830
BI fresh	Land system change	Some freshwater (keystone fish) can disperse plant seeds. Therefore, a decrease in their biomass could negatively affect new plant growth. They also interact indirectly via salmon runs and spread of carcasses in the forests by bears.	Hume (2011)	https://www.theglobeandmail.com/news/british-columbia/health-of-salmon-run-affects-ecosystem-of-forest/article597181/
			Quinn et al. (2009)	https://cdnsciencepub.com/doi/abs/10.1139/Z09-004#.X1JL3HkzaUk
			Arantes et al. (2019)	https://www.nature.com/articles/s41598-019-52243-0
			Arantes et al. (2017)	https://besjournals.onlinelibrary.wiley.com/doi/10.1111/1365-2664.12967
			Gottsberger (1978)	https://www.researchgate.net/profile/Gerhard-Gottsberger/publication/273079013_Seed_Dispersal_by_Fish_in_the_Inundated_Regions_of_Humaita_Amazonia/links/59fc9abcaca272347a21dd0d/Seed-Dispersal-by-Fish-in-the-Inundated-Regions-of-Humaita-Amazonia.pdf
BI fresh	Blue water	A potential interaction exists if changes in freshwater (keystone) fish biomass leads to increased macrophyte growth, it could potentially affect river discharge. The extent and significance of such interaction is extremely uncertain and was not able to be established in this elicitation.
Bi ocean	BI land	Coastal ecosystems are interacting with terrestrial biodiversity via trophic interactions. Many land animals feed of coastal (keystone) fish or other marine organisms.	Crawford & Shelton (1978)	https://www.sciencedirect.com/science/article/abs/pii/0006320778900265
			Hansson et al. (2017)	https://academic.oup.com/icesjms/article/75/3/999/4616536?login=true
Bi ocean	Bi freshwater	Coastal and freshwater environments are connected via trophic interactions. Depending on the migration direction, freshwater (keystone) fish species can prey on or be prey to coastal freshwater (keystone) fish species.	Beguer-Pon et al. (2012)	https://journals.plos.org/plosone/article?id=10.1371/journal.pone.0046830
Bi ocean	Land system change	Coastal (keystone) fish interact with forest cover via the dispersal of seeds. This is probably a special-case weak interaction present in specific mangrove forest.	Osborne et al. (2019)	https://www.biorxiv.org/content/10.1101/719757v1.full
Land system change	BI land	Forest cover interacts with terrestrial biodiversity via changes it can cause to habitat area size, structure and diversity leading to habitats of lower integrity.	De Palma et al. (2019)	https://www.biorxiv.org/content/10.1101/311688v3.full
			Arroyo-Rodríguez et al. (2020)	https://onlinelibrary.wiley.com/doi/full/10.1111/ele.13535
			Usubiaga-Liaño et al. (2019)	https://www.nature.com/articles/s41893-019-0300-8
			Sanchez-Ortiz et al. (2019)	https://www.biorxiv.org/content/10.1101/576546v1
			Melo et al. (2018)	https://onlinelibrary.wiley.com/doi/full/10.1111/jofo.12272
			Newbold et al. (2016)	https://science.sciencemag.org/content/353/6296/288.full
			Newbold et al. (2015)	https://www.nature.com/articles/nature14324
			Newbold et al. (2020)	https://www.nature.com/articles/s41598-020-70960-9
Land system change	Bi fresh	Forest cover can impact freshwater (keystone) fish biomass via changes in riparian habitat structure and food availability as some fish might feed on seeds and fruits.	Arantes et al. (2017)	https://besjournals.onlinelibrary.wiley.com/doi/full/10.1111/1365-2664.12967
			Tanenzap et al. (2014)	https://www.nature.com/articles/ncomms5077
Land system change	Biogeochemical flows	Forest cover prevents nitrogen loss and is fixating nitrogen. Land degradation and increased decomposition of organic matter due to forest loss leads to increased nitrogen concentration in runoff to surface waters.	Mupepele and Dormann (2017)	https://www.mdpi.com/1999-4907/8/1/5
			Biggs et al. (2004)	https://link.springer.com/article/10.1023/B:BIOG.0000025744.78309.2e
			Lassaletta et al. (2010)	https://www.sciencedirect.com/science/article/pii/S1462901110000468
Land system change	Blue water	Forest cover interacts with river discharge with various counteracting mechanisms. Higher forest cover means higher infiltration which leads to decreased surface runoff and decreased river discharge. In contrary, higher forest cover leads to less erosion and less sedimentation which leads to higher river discharge.	Dennedy-Frank and Gorelick (2019)	https://www.sciencedirect.com/science/article/pii/S0959378018307283
			Neph (2012)	https://www.tandfonline.com/doi/full/10.1080/00221686.2012.696559
Land system change	Green water	Forest cover affects soil moisture in various ways. More forest cover, means more natural vegetation, more evapotranspiration, more precipitation and thus more soil moisture. Furthermore, more natural vegetation means higher infiltration/water holding/root zone storage capacity and therefore higher soil moisture.	Bruijnzeel (2004)	https://www.sciencedirect.com/science/article/pii/S0167880904000404
			Lawrence et al. (2015)	https://www.nature.com/articles/nclimate2430
			Zemp et al. (2017)	https://agupubs.onlinelibrary.wiley.com/doi/10.1002/2017GL072955
			Nobre et al. (2016)	https://www.pnas.org/content/113/39/10759
			Keys et al. (2016)	https://journals.plos.org/plosone/article?id=10.1371/journal.pone.0151993
			Staal et al. (2018)	https://www.nature.com/articles/s41558-018-0177-y
			Peña-Arancibia et al. (2019)	https://www.sciencedirect.com/science/article/pii/S0022169419304032
			Rost et al. (2008)	https://adgeo.copernicus.org/articles/18/43/2008/
Biogeochemical flows	Bi land	Terrestrial biodiversity can both benefit from and also be impacted by increased nitrogen concentration in runoff. If the increased concentration is low or in N limited environments it could boost plant productivity. On the other side, if increased too much, soil acidification and toxicity to N-poor adapted species are possible.	Dise et al. (2011)	http://citeseerx.ist.psu.edu/viewdoc/download?doi=10.1.1.739.264&rep=rep1&type=pdf
			Porter et al. (2012)	https://link.springer.com/article/10.1007/s10533-012-9803-3
Biogeochemical flows	BI fresh	Freshwater (keystone) fish can be impacted by increased nitrogen concentration in water that can cause eutrophication after some critical limit. Before that, extra nutrients in the water might be beneficial and boost productivity.	Camargo & Alonso (2006)	https://www.sciencedirect.com/science/article/pii/S0160412006000602
			Winfield (2015)	https://onlinelibrary.wiley.com/doi/abs/10.1002/9781118394380.ch54
Biogeochemical flows	BI ocean	Coastal (keystone) fish can be impacted by increased nitrogen concentration in water that can cause eutrophication after some critical limit. Before that, extra nutrients in the water might be beneficial and boost productivity.	Voss et al. (2011)	https://oceanrep.geomar.de/12181/1/ENA_c8.pdf
			Snickars et al. (2014)	https://link.springer.com/article/10.1007/s00227-014-2579-3
			Sandström & Karås (2002)	https://link.springer.com/article/10.1023/A:1013828304074
			Fredston-Hermann et al. (2016)	https://www.frontiersin.org/articles/10.3389/fmars.2016.00273/full
Biogeochemical flows	Land system change	Nitrogen concentration in runoff to surface water can have a minor impact on forest cover. The extra nutrients can potentially boost plant productivity but it can also cause soil acidification that will negatively impact forest cover.	Moldan et al. (2006)	https://www.sciencedirect.com/science/article/pii/S026974910600073X?via%3Dihub#fig1
Blue water	BI land	River discharge can interact with terrestrial biodiversity in different ways. Maintaining sufficient water flow (remaining at high levels relative to environmental flow requirements) is beneficial for aquatic integrity which leads to better water quality available for terrestrial oragnisms. Also sufficient water flow is beneficial for proper ecosystem functioning and thus can have a positive impa…	Nilsson & Berggren (2000)	https://academic.oup.com/bioscience/article/50/9/783/269505
Blue water	Bi fresh	River discharge can impact freshwater biodiversity (keystone fish species) in different ways. Sufficient water flows (remaining at high levels relative to environmental flow requirments) can have a possitive impact on ecosystem integrity and therefore for spawning and breeding grounds. In addition, sufficient water flows ensures satisfactory diadromous fish migration and also nutrient and energy …	Rytwinski et al. (2017)	https://environmentalevidencejournal.biomedcentral.com/articles/10.1186/s13750-017-0093-z
			Rolls et al. (2017)	https://onlinelibrary.wiley.com/doi/full/10.1111/brv.12381
Blue water	BI ocean	River discharge can impact coastal biodiversity (keystone fish species) in different ways. Sufficient water flows (remaining at high levels relative to environmental flow requirements) improve the condition of spawning and breeding grounds, and ensure satisfactory diadromous fish migration, and nutrient and energy transfer.	Thorstad et al. (2008)	https://link.springer.com/article/10.1007%2Fs11160-007-9076-4
			Koster et al. (2016)	https://doi.org/10.1071/MF15398
Blue water	Land system change	Sufficient river discharge has a positive impact on terrestrial/riparian integrity which can have a positive impact on terrestrial productivity and forest cover.	BMZ-IUCN-WWF (2019)	https://wwfeu.awsassets.panda.org/downloads/wwf_mcr_sediment_flow_in_the_context_of_mangrove_restoration_and_conservation_v6_5_web.pdf
Blue water	Green water	River discharge can impact soil moisture during the high flow season. Increased river discharge has a positive impact on flooding and groundwater recharge which as a result have a positive impact on soil moisture.	Kaplan & Muñoz-Carpena (2011)	https://doi.org/10.1016/j.jhydrol.2010.12.019
Green water	BI land	Soil moisture interacts with terrestrial biodiversity via changes in ecosystem integrity. Decreased soil moisture could impact microclimate regulation, ecosystem functioning and habitat structure in ways that could negative affect terrestrial biodiversity.	Härdtle et al. (2003)	https://www.sciencedirect.com/science/article/pii/S0378112703000914
			Engel et al. (2009)	https://academic.oup.com/jpe/article/2/1/1/949394?login=true
			Tsiafouli et al. (2005)	https://www.sciencedirect.com/science/article/pii/S0929139304001295#bib28
Green water	Land system change	Soil moisture is affecting forest cover with different mechanisms. First, directly increased soil moisture have a positive impact on maintanance of forest cover. On the contrary, decrease in soil moisture can leas to more wild fires than decrease forest cover.	D'Odorico et al. (2007)	https://doi.org/10.1029/2006JG000379
			Pausas and Ribeiro (2013)	https://onlinelibrary.wiley.com/doi/10.1111/geb.12043
Green water	Biogeochemical flows	Soil moisture and nitrogen concentration in runoff to surface water interact with various counteracting mechanisms. A high level of soil moisture ensures more nitrogen fixation and therefore less nitrogen leaching. At the same time, higher levels os soil moisture mean more nitrogen leaching from plant residues, due to increased vegetation growth. Also more soil moisture means more evapotranspirat…	Quemada and Gabriel (2016)	https://www.sciencedirect.com/science/article/pii/S2211912416300232
Green water	Blue water	Soil moisture is affecting river discharge with different mechanisms. More soil moisture means more evapotranspiration, more precipitation and more surface runoff which means higher river discharge. At the same time, more soil moisture means less deficient soil so that means more surface runoff which means more river discharge. Also more soil moisture means higher groundwater discharge which lead…	O'Geen (2013)	https://www.nature.com/scitable/knowledge/library/soil-water-dynamics-103089121/

## Sheet: ranking_mechanisms
BI land --> BI fresh
a) Terrestrial biodiversity →+ Nutrient flow →∓ Keystone fish biomass
b) Terrestrial biodiversity →+ Predation →- Keystone fish biomass
c) Terrestrial biodiversity →+ Ecosystem functioning →+ Keystone fish biomass
d) Terrestrial biodiversity →+ Riparian zone structure and river flow →+ Keystone fish biomass
BI land-->BI ocean
a) Terrestrial biodiversity →∓ Geochemical flows →∓ Keystone fish biomass
b) Terrestrial biodiversity →+ Energy and materials transfer →+ Keystone fish biomass
c) Terrestrial biodiversity →∓ River discharge →∓ Keystone fish biomass
d) Terrestrial biodiversity →+ Spawning and nursery grounds →+ Keystone fish biomass
BI land-->Land system change
a) Terrestrial biodiversity →+ Seed dispersal →+ Forest cover
b) Terrestrial biodiversity →+ Seedlings consumption →- Forest cover
c) Terrestrial biodiversity →+ Pollination →+ Forest cover
d) Terrestrial biodiversity →+ Pest control →+ Forest cover
e) Terrestrial biodiversity →+ Ecosystem functioning →+ Forest cover
f) Terrestrial biodiversity →+ Megaherbivores →- Forest cover
BI land-->Biog.flows
a) Terrestrial biodiversity →+ Riparian integrity →- Nitrogen loss →+ N runoff concentration
b) Terrestrial biodiversity →+ Manure on land →+ Nitrogen loss →+ N runoff concentration
c) Terrestrial biodiversity →+ Ecosystem nitrogen uptake →- Nitrogen loss →+ N runoff concentration
BI land-->Blue water
a) Terrestrial biodiversity →∓ Natural vegetation →∓ River discharge
b) Terrestrial biodiversity →∓ Forest cover →∓ River discharge
c) Terrestrial biodiversity →- Land degradation →+ River discharge
d) Terrestrial biodiversity →- Land degradation →+ Sedimentation in irrigation systems →- River discharge
e) Terrestrial biodiversity →+ Nutrient and water exchange flows (via animals) →∓ River discharge
BI land-->Green water
a) Terrestrial biodiversity →+ Soil water holding capacity →+ Soil moisture
b) Terrestrial biodiversity →- Erosion →- Soil moisture
c) Terrestrial biodiversity →- Erosion →- Soil water holding capacity →+ Soil moisture
d) Terrestrial biodiversity →+ Vegetation composition →+ Soil moisture
e) Terrestrial biodiversity →+ Vegetation composition →+ Precipitation →+ Soil moisture
BI fresh-->BI land
a) Keystone fish biomass →+ Water quality →+ Terrestrial biodiversity
b) Keystone fish biomass →+ Nutrient processing →+ Terrestrial biodiversity
c) Keystone fish biomass →+ Food availability →+ Terrestrial biodiversity
d) Keystone fish biomass →+ Freshwater ecosystem integrity →+ Reproductive grounds →+ Terrestrial biodiversity
BI fresh-->BI ocean
a) Freshwater keystone fish biomass →+ Geochemical flows →+ Coastal keystone fish biomass
b) Freshwater keystone fish biomass →+ Predation →- Coastal keystone fish biomass
c) Freshwater keystone fish biomass →+ Nutrient cycling →+ Coastal keystone fish biomass
d) Freshwater keystone fish biomass →+ Energy and materials transfer →+ Coastal keystone fish biomass
e) Freshwater keystone fish biomass →+ Food availability →+ Coastal keystone fish biomass
BI fresh-->Land system change
a) Keystone fish biomass →+ Seed dispersal →+ Forest cover
b) Keystone fish biomass →- Excess nutrients →+ Nutrient imbalance →- Forest cover
c) Keystone fish biomass →+ Food availability →+ Terrestrial biodiversity →- Forest cover
d) Keystone fish biomass →+ Food availability →+ Nutrient supply via carcasses →+ forest cover
BI fresh-->Biog.flows
No mechanisms were identified for this interaction.
BI fresh-->Blue water
a) Keystone fish biomass →∓ River channelization →∓ River discharge
b) Keystone fish biomass →- Sediment turbidity →+ Underwater vegetation →- River discharge
BI fresh-->Green water
a) Keystone fish biomass →+ Freshwater ecosystem integrity →+ Nutrient export →+ Terrestrial ecosystem integrity →∓ Soil moisture
b) Keystone fish biomass →+ Freshwater ecosystem integrity →+ Terrestrial ecosystem integrity →∓ Soil moisture
c) Keystone fish biomass →+ Beavers →- Dams →- Groundwater table →+ Soil moisture
BI ocean-->BI land
a) Keystone fish biomass →+ Mangrove forests →+ Terrestrial biodiversity
b) Keystone fish biomass →+ Food availability →+ Terrestrial biodiversity
c) Keystone fish biomass →+ Energy and nutrient transfer →+ Terrestrial biodiversity
BI ocean-->BI fresh
a) Coastal keystone fish biomass →+ Food availability →+ Birds and other predators →+ Nutrient return →+ Freshwater keystone fish biomass
b) Coastal keystone fish biomass →+ Predation →- Freshwater keystone fish biomass
c) Coastal keystone fish biomass →+ Anadromous migration →+ Nutrient return →+ Freshwater keystone fish biomass
BI ocean-->Land system change
a) Keystone fish biomass →+ Seed dispersal →+ Forest cover
b) Keystone fish biomass →+ Fertilization →+ Forest cover
c) Keystone fish biomass →+ Nutrient flux →+ Forest cover
d) Keystone fish biomass →+ Food availability for terrestrial animals →+ Nutrient flux →+ Forest cover
BI ocean-->Biog.flows
a) Keystone fish biomass →+ Food availability for terrestrial animals →+ Nutrient supply via carcasses →+ N runoff concentration
b) Keystone fish biomass →+ Food availability for seabirds →+ Nutrient import (via guano) →+ N runoff concentration
BI ocean-->Blue water
a) Keystone fish biomass →+ Anadromous migration →+ Ocean-land nutrient flux →+ Riparian system integrity →∓ River discharge
BI ocean-->Green water
a) Keystone fish biomass →∓ Microclimate regulation →∓ Forest cover →+ Soil moisture
b) Keystone fish biomass →+ Anadromous migration →+ Nutrient supply →+ Forest cover →+ Soil moisture
Land system change-->BI land
a) Forest cover →+ Habitat area →+ Terrestrial biodiversity
b) Forest cover →- Ecosystem fragmentation →- Ecosystem integrity →+ Terrestrial biodiversity
c) Forest cover →∓ Climate, water and biogeochemical flows →∓ Ecosystem integrity →+ Terrestrial biodiversity
d) Forest cover →∓ Land cover diversity →+ Terrestrial biodiversity
Land system change-->BI fresh
a) Forest cover →- Nutrient loss →+ Primary production→∓ Keystone fish biomass
b) Forest cover →- Erosion and sediment flows →- Keystone fish biomass
c) Forest cover →+ Habitat physical structure →+ Keystone fish biomass
d) Forest cover →∓ River discharge →∓ Keystone fish biomass
e) Forest cover →+ Food availability →+ Keystone fish biomass
f) Forest cover →+ Functional diversity →+ Keystone fish biomass
Land system change-->BI ocean
a) Forest cover →- Freshwater flux →- Keystone fish biomass
b) Forest cover →- Nutrient flow →∓ Keystone fish biomass
c) Forest cover →- Erosion and toxins release →- Keystone fish biomass
Land system change-->Biog.flows
a) Forest cover →+ Vegetation preventing nitrate leaching →- Nitrate leaching →+ N runoff concentration
b) Forest cover →- Decomposition of soil and aboveground organic matter →+ Nutrient loss →+ N runoff concentration
c) Forest cover →- Erosion and land degradation →+ Nutrient loss →+ N runoff concentration
Land system change-->Blue water
a) Forest cover →∓ Groundwater recharge →+ River discharge
b) Forest cover →+ Precipitation →+ River discharge
c) Forest cover →∓ Evapotranspiration →- River discharge
d) Forest cover →- Surface runoff →+ River discharge
e) Forest cover →- Erosion and sedimentation →- River discharge
Land system change-->Green water
a) Forest cover →+ Root zone infiltration →+ Soil moisture
b) Forest cover →+ Precipitation →+ Soil moisture
c) Forest cover →∓ Evapotranspiration →- Soil moisture
d) Forest cover →- Surface runoff →+ Soil moisture
e) Forest cover →- Land erosion →- Soil moisture
Biog.flows-->BI land
a) N runoff concentration →+ Productivity →+ Terrestrial biodiversity
b) N runoff concentration →+ Eutrophication →- Functional diversity →+ Terrestrial biodiversity
c) N runoff concentration →+ toxicity to N-poor adapted species →- Terrestrial biodiversity
Biog.flows-->BI fresh
a) N runoff concentration →+ Productivity →+ Keystone fish biomass
b) N runoff concentration →+ Eutrophication & acidification →- Keystone fish biomass
Biog.flows-->BI ocean
a) N runoff concentration →+ Productivity →+ Keystone fish biomass
b) N runoff concentration →+ Eutrophication & acidification →- Keystone fish biomass
Biog.flows-->Land system change
a) N runoff concentration →+ Productivity →∓ Forest cover
b) N runoff concentration →+ Soil acidification →- Forest cover
Biog.flows-->Blue water
N runoff concentration →+ Productivity →+ Macrophytes growth →- River discharge
Biog.flows-->Green water
a) N runoff concentration →+ Plant growth →+ Evapotranspiration →+ Precipitation →+ Soil moisture
b) N runoff concentration →+ Plant growth →+ Evapotranspiration →- Soil moisture →+ Salt concentration in soils →- Plant growth →+ Soil moisture
c) N runoff concentration →+ Soil acidification →- Plant growth →+ evapotranspiration →+ Soil moisture
d) N runoff concentration →+ Soil water holding capacity →+ Soil moisture
Blue water-->BI land
a) River discharge →∓ Habitat integrity and ecosystem functioning →+ Terrestrial biodiversity
b) River discharge →+ Reproduction →+ Terrestrial biodiversity
c) River discharge →+ Water availability and floodings →∓ Terrestrial biodiversity
d) River discharge →+ Aquatic animals →+ Food availability →+ Terrestrial biodiversity
e) River discharge →+ Aquatic-terrestrial connectivity →+ Terrestrial biodiversity
Blue water-->BI fresh
a) River discharge →+ freshwater and wetland area/habitat →+ Keystone fish biomass
b) River discharge →+ Breeding and spawning grounds →+ Keystone fish biomass
c) River discharge →+ Fish migration →+ Keystone fish biomass
d) River discharge →- Temperature →- Keystone fish biomass
e) River discharge →+ Oxygen content →+ Keystone fish biomass
Blue water-->BI ocean
a) River discharge →+ Migration and spawning →+ Keystone fish biomass
b) River discharge →+ Nutrient flux →+ Keystone fish biomass
c) River discharge →+ Heat transport →+ Keystone fish biomass
d) River discharge →- Salinity →∓ Keystone fish biomass
e) River discharge →+ Sediment loading →- Keystone fish biomass
Blue water-->Land system change
a) River discharge →+ Soil moisture →+ Forest cover
b) River discharge →+ Air moisture →+ Forest cover
c) River discharge →∓ Riparian communities →+ Forest cover
d) River discharge →+ Water logging →- Forest cover
e) River discharge →+ Groundwater recharge →+ Forest cover
f) River discharge →+ Sediment transport →+ Forest cover (mangrove forests and deltas)
Blue water-->Biog.flows
No mechanisms were identified for this interaction.
Blue water-->Green water
a) River discharge →+ Flooding →+ Soil moisture
b) River discharge →+ Groundwater recharge →+ Soil moisture
c) River discharge →+ Infiltration around waterways →+ Soil moisture
Green water-->BI land
a) Soil moisture →+ Vegetation growth →+ Food availability →+ Terrestrial biodiversity
b) Soil moisture →+ Forest area →+ Terrestrial biodiversity
c) Soil moisture →∓ direct habitat loss (species adapted to specific soil conditions) →- Terrestrial biodiversity
d) Soil moisture →+ Internal moisture cycling →- Droughts and fires →- Terrestrial biodiversity
Green water-->BI fresh
a) Soil moisture →+ Plant growth →+ Food availability →+ Keystone fish biomass
b) Soil moisture →+ Nutrient flow →+ Productivity →+ Keystone fish biomass
c) Soil moisture →+ Nutrient flow →+ Keystone fish biomass
d) Soil moisture →+ River discharge →+ Keystone fish biomass
e) Soil moisture →+ Groundwater recharge →+ River discharge →+ Keystone fish biomass
Green water-->BI ocean
a) Soil moisture →+ Plant growth →+ Food availability →+ Keystone fish biomass
b) Soil moisture →+ Nutrient flow →+ Productivity →+ Keystone fish biomass
Green water-->Land system change
a) Soil moisture →- Water stress →∓ Forest cover
b) Soil moisture →- Wild fires →- Forest cover
Green water-->Biog.flows
a) Soil moisture →- Erosion →+ N runoff concentration
b) Soil moisture →+ Runoff/drainage →+ N leaching →∓ N concentration in runoff (direction depending on whether reduction in leaching outweights reduction in runoff)
c) Soil moisture →+ Nitrogen fixation →- N leaching →+ N runoff concentration
Green water-->Blue water
a) Soil moisture →- Infiltration capacity →- Runoff →+ River discharge
b) Soil moisture →+ Groundwater recharge →+ River discharge
c) Soil moisture →+ Vegetation cover →- Runoff →+ River discharge
d) Soil moisture →+ Evapotranspiration →+ Precipitation →+ River discharge
e) Soil moisture →+ Flood peaks →+ River discharge
